# Supplementary material for: Exhumation and erosion of the Northern Apennines, Italy: new insights from low-temperature thermochronometers
Source: Copernicus journal article supplement (doi:10.5194/se-13-347-2022), 2022-02-16
Supplement: Supplementary file 1 [file se-13-347-2022-supplement.pdf]

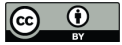

*Supplement of*

## **Exhumation and erosion of the Northern Apennines, Italy: new insights from low-temperature thermochronometers**

**Erica D. Erlanger et al.**

*Correspondence to:* Erica D. Erlanger (ederlanger@gmail.com)

The copyright of individual parts of the supplement might differ from the article licence.

## Supplement for SE-2021-96

Supplementary Table 1 Compilation of bedrock AHe cooling ages and sample descriptions.

| ID        | Meth<br>od | Lithology                         | Latitude | Longitu<br>de | Sample<br>Elevatio<br>n (km) | Mean<br>Elevati<br>on<br>(km) | Age<br>(Ma) | Error<br>(2 $\sigma$ ) | Surface<br>Tempera<br>ture (°C) | Reference             |
|-----------|------------|-----------------------------------|----------|---------------|------------------------------|-------------------------------|-------------|------------------------|---------------------------------|-----------------------|
| 020620-3  | AHe        | Macigno Unit                      | 44.122   | 10.068        | 0.756                        | 0.383                         | 3.66        | 0.22                   | 12.19                           | Fellin et al. (2007)  |
| 03AP34    | AHe        | Macigno Unit                      | 44.066   | 10.107        | 0.285                        | 0.340                         | 6.89        | 1.22                   | 12.40                           | Fellin et al. (2007)  |
| 03AP47    | AHe        | PseudoMacigno Unit/Apuan autoch.* | 44.128   | 10.259        | 0.890                        | 0.870                         | 3.60        | 0.22                   | 9.75                            | Fellin et al. (2007)  |
| 03AP51    | AHe        | Macigno Unit                      | 44.014   | 10.380        | 1.060                        | 0.688                         | 6.85        | 0.41                   | 10.66                           | Fellin et al. (2007)  |
| 03AP58    | AHe        | PseudoMacigno Unit/Apuan autoch.* | 44.003   | 10.308        | 0.305                        | 0.665                         | 5.86        | 0.35                   | 10.77                           | Fellin et al. (2007)  |
| 03GB04    | AHe        | PseudoMacigno Unit/Apuan autoch.* | 43.974   | 10.277        | 0.600                        | 0.440                         | 5.45        | 0.33                   | 11.90                           | Fellin et al. (2007)  |
| 03GB07    | AHe        | Macigno Unit                      | 44.124   | 10.059        | 0.675                        | 0.356                         | 5.10        | 0.31                   | 12.32                           | Fellin et al. (2007)  |
| 03GB09    | AHe        | Macigno Unit                      | 44.162   | 10.115        | 0.335                        | 0.546                         | 3.51        | 0.21                   | 11.37                           | Fellin et al. (2007)  |
| 03GB10    | AHe        | Macigno Unit                      | 44.177   | 10.156        | 0.530                        | 0.656                         | 6.32        | 0.38                   | 10.82                           | Fellin et al. (2007)  |
| 03RE19    | AHe        | PseudoMacigno Unit/Apuan autoch.* | 44.009   | 10.315        | 0.270                        | 0.704                         | 4.04        | 0.24                   | 10.58                           | Fellin et al. (2007)  |
| 03RE20    | AHe        | Macigno Unit                      | 44.098   | 10.326        | 1.055                        | 0.808                         | 4.74        | 0.28                   | 10.06                           | Fellin et al. (2007)  |
| 03AP08AB  | AHe        | Macigno Unit                      | 44.190   | 10.632        | 0.880                        | 1.295                         | 3.36        | 0.20                   | 7.63                            | Thomson et al. (2010) |
| 03AP12A   | AHe        | Macigno Unit                      | 44.110   | 10.735        | 0.815                        | 1.155                         | 4.65        | 0.28                   | 8.33                            | Thomson et al. (2010) |
| 03AP23A   | AHe        | Macigno Unit                      | 44.129   | 10.429        | 0.425                        | 0.709                         | 9.80        | 0.59                   | 10.56                           | Thomson et al. (2010) |
| 03AP23B   | AHe        | Macigno Unit                      | 44.129   | 10.429        | 0.425                        | 0.709                         | 6.27        | 0.38                   | 10.56                           | Thomson et al. (2010) |
| 03AP28A   | AHe        | Macigno Unit                      | 44.111   | 10.529        | 1.035                        | 0.899                         | 6.60        | 0.40                   | 9.60                            | Thomson et al. (2010) |
| 03AP28C   | AHe        | Macigno Unit                      | 44.111   | 10.529        | 1.035                        | 0.899                         | 7.66        | 0.46                   | 9.60                            | Thomson et al. (2010) |
| 03AP28D   | AHe        | Macigno Unit                      | 44.111   | 10.529        | 1.035                        | 0.899                         | 6.12        | 0.37                   | 9.60                            | Thomson et al. (2010) |
| 03AP29A   | AHe        | Macigno Unit                      | 44.130   | 10.542        | 1.320                        | 1.050                         | 5.33        | 0.32                   | 8.85                            | Thomson et al. (2010) |
| 03AP31A   | AHe        | Macigno Unit                      | 44.142   | 10.553        | 1.815                        | 1.131                         | 7.40        | 0.44                   | 8.44                            | Thomson et al. (2010) |
| 03AP31B   | AHe        | Macigno Unit                      | 44.142   | 10.553        | 1.815                        | 1.131                         | 5.22        | 0.31                   | 8.44                            | Thomson et al. (2010) |
| 03AP51C   | AHe        | Macigno Unit                      | 44.014   | 10.380        | 1.060                        | 0.688                         | 7.92        | 0.48                   | 10.66                           | Thomson et al. (2010) |
| 03AP52A   | AHe        | Macigno Unit                      | 44.084   | 10.463        | 0.370                        | 0.582                         | 7.04        | 0.42                   | 11.19                           | Thomson et al. (2010) |
| 03AP52B   | AHe        | Macigno Unit                      | 44.084   | 10.463        | 0.370                        | 0.582                         | 7.00        | 0.42                   | 11.19                           | Thomson et al. (2010) |
| 03AP52C   | AHe        | Macigno Unit                      | 44.084   | 10.463        | 0.370                        | 0.582                         | 8.01        | 0.48                   | 11.19                           | Thomson et al. (2010) |
| 03RE02    | AHe        | Macigno Unit                      | 44.148   | 10.438        | 0.765                        | 0.836                         | 6.85        | 0.41                   | 9.92                            | Thomson et al. (2010) |
| 03RE05A   | AHe        | Macigno Unit                      | 44.188   | 10.480        | 1.495                        | 1.138                         | 6.73        | 0.40                   | 8.41                            | Thomson et al. (2010) |
| 03RE05B   | AHe        | Macigno Unit                      | 44.188   | 10.480        | 1.495                        | 1.138                         | 5.71        | 0.34                   | 8.41                            | Thomson et al. (2010) |
| 03RE05C   | AHe        | Macigno Unit                      | 44.188   | 10.480        | 1.495                        | 0.582                         | 8.10        | 0.49                   | 11.19                           | Thomson et al. (2010) |
| 03RE05CD  | AHe        | Macigno Unit                      | 44.188   | 10.480        | 1.495                        | 1.138                         | 9.41        | 0.56                   | 8.41                            | Thomson et al. (2010) |
| 03RE05D   | AHe        | Macigno Unit                      | 44.188   | 10.480        | 1.495                        | 0.582                         | 6.37        | 0.38                   | 11.19                           | Thomson et al. (2010) |
| 03RE06A   | AHe        | Macigno Unit                      | 44.201   | 10.488        | 1.640                        | 1.194                         | 5.93        | 0.36                   | 8.13                            | Thomson et al. (2010) |
| 03RE06B   | AHe        | Macigno Unit                      | 44.201   | 10.488        | 1.640                        | 1.194                         | 6.43        | 0.39                   | 8.13                            | Thomson et al. (2010) |
| 03RE12A   | AHe        | Macigno Unit                      | 44.059   | 10.767        | 0.460                        | 0.942                         | 5.87        | 0.35                   | 9.39                            | Thomson et al. (2010) |
| 03RE12B   | AHe        | Macigno Unit                      | 44.059   | 10.767        | 0.460                        | 0.942                         | 5.55        | 0.33                   | 9.39                            | Thomson et al. (2010) |
| 03RE14A   | AHe        | Macigno Unit                      | 44.005   | 10.665        | 0.840                        | 0.635                         | 5.28        | 0.32                   | 10.92                           | Thomson et al. (2010) |
| 03RE14B   | AHe        | Macigno Unit                      | 44.005   | 10.665        | 0.840                        | 0.635                         | 9.95        | 0.60                   | 10.92                           | Thomson et al. (2010) |
| 03RE7     | AHe        | Macigno Unit                      | 44.200   | 10.676        | 1.600                        | 1.214                         | 2.88        | 0.17                   | 8.03                            | Thomson et al. (2010) |
| 03RE7R1   | AHe        | Macigno Unit                      | 44.200   | 10.676        | 1.600                        | 1.214                         | 3.14        | 0.19                   | 8.03                            | Thomson et al. (2010) |
| 03TH02    | AHe        | Macigno Unit                      | 44.086   | 10.568        | 0.979                        | 0.881                         | 6.70        | 0.40                   | 9.70                            | Thomson et al. (2010) |
| 03TH02B   | AHe        | Macigno Unit                      | 44.086   | 10.568        | 0.979                        | 0.881                         | 7.51        | 0.45                   | 9.70                            | Thomson et al. (2010) |
| 03TH12B   | AHe        | Macigno Unit                      | 44.080   | 10.600        | 0.678                        | 0.904                         | 4.27        | 0.26                   | 9.58                            | Thomson et al. (2010) |
| 03TH13A   | AHe        | Macigno Unit                      | 44.013   | 10.593        | 0.153                        | 0.578                         | 8.18        | 0.49                   | 11.21                           | Thomson et al. (2010) |
| 03TH13C   | AHe        | Macigno Unit                      | 44.013   | 10.593        | 0.153                        | 0.578                         | 7.27        | 0.44                   | 11.21                           | Thomson et al. (2010) |
| 03TH18A   | AHe        | Macigno Unit                      | 43.980   | 10.552        | 0.047                        | 0.449                         | 6.74        | 0.40                   | 11.85                           | Thomson et al. (2010) |
| 03TH23A   | AHe        | Macigno Unit                      | 44.124   | 10.628        | 1.645                        | 1.205                         | 4.73        | 0.28                   | 8.08                            | Thomson et al. (2010) |
| 03TH23BD  | AHe        | Macigno Unit                      | 44.124   | 10.628        | 1.645                        | 1.205                         | 5.38        | 0.32                   | 8.08                            | Thomson et al. (2010) |
| 03TH23C   | AHe        | Macigno Unit                      | 44.124   | 10.628        | 1.645                        | 1.205                         | 4.55        | 0.27                   | 8.08                            | Thomson et al. (2010) |
| 050320-1C | AHe        | Helminthoid Flysch                | 44.263   | 10.664        | 1.112                        | 1.024                         | 1.15        | 0.11                   | 8.98                            | Thomson et al. (2010) |
| 050320-1D | AHe        | Helminthoid Flysch                | 44.263   | 10.664        | 1.112                        | 1.024                         | 1.84        | 0.11                   | 8.98                            | Thomson et al. (2010) |
| 050320-2B | AHe        | Helminthoid Flysch                | 44.276   | 10.674        | 1.239                        | 0.965                         | 5.28        | 0.32                   | 9.27                            | Thomson et al. (2010) |
| 050320-2C | AHe        | Helminthoid Flysch                | 44.276   | 10.674        | 1.239                        | 0.965                         | 5.42        | 0.33                   | 9.27                            | Thomson et al. (2010) |
| 050320-3A | AHe        | Helminthoid Flysch                | 44.280   | 10.668        | 1.272                        | 0.957                         | 9.29        | 0.56                   | 9.31                            | Thomson et al. (2010) |

|           |     |                         |        |        |       |       |      |      |       |                       |
|-----------|-----|-------------------------|--------|--------|-------|-------|------|------|-------|-----------------------|
| 050320-3B | AHe | Helminthoid Flysch      | 44.280 | 10.668 | 1.272 | 0.957 | 6.04 | 0.66 | 9.31  | Thomson et al. (2010) |
| 050320-3C | AHe | Helminthoid Flysch      | 44.280 | 10.668 | 1.272 | 0.957 | 6.61 | 0.40 | 9.31  | Thomson et al. (2010) |
| 1926      | AHe | Marnoso Arenacea Unit   | 44.107 | 11.729 | 0.250 | 0.471 | 6.14 | 0.37 | 11.75 | Thomson et al. (2010) |
| 1926B     | AHe | Marnoso Arenacea Unit   | 44.107 | 11.729 | 0.250 | 0.471 | 3.16 | 0.19 | 11.75 | Thomson et al. (2010) |
| 1926C     | AHe | Marnoso Arenacea Unit   | 44.107 | 11.729 | 0.250 | 0.471 | 5.88 | 0.35 | 11.75 | Thomson et al. (2010) |
| 1926D     | AHe | Marnoso Arenacea Unit   | 44.107 | 11.729 | 0.250 | 0.471 | 2.89 | 0.17 | 11.75 | Thomson et al. (2010) |
| 1929      | AHe | Marnoso Arenacea Unit   | 44.037 | 11.504 | 0.700 | 0.702 | 1.65 | 0.10 | 10.59 | Thomson et al. (2010) |
| AP1       | AHe | Marnoso Arenacea Unit   | 43.790 | 12.146 | 0.700 | 0.776 | 1.34 | 0.08 | 10.22 | Thomson et al. (2010) |
| AP17      | AHe | Marnoso Arenacea Unit   | 43.876 | 12.110 | 0.600 | 0.605 | 1.94 | 0.12 | 11.07 | Thomson et al. (2010) |
| AP2       | AHe | Marnoso Arenacea Unit   | 43.79  | 12.15  | 0.60  | 0.77  | 2.41 | 0.14 | 10.25 | Thomson et al. (2010) |
| AP3       | AHe | Marnoso Arenacea Unit   | 43.815 | 12.149 | 0.900 | 0.727 | 3.27 | 0.20 | 10.46 | Thomson et al. (2010) |
| AP30      | AHe | Marnoso Arenacea Unit   | 43.895 | 11.779 | 0.750 | 0.879 | 1.62 | 0.10 | 9.70  | Thomson et al. (2010) |
| AP33      | AHe | Marnoso Arenacea Unit   | 43.919 | 11.792 | 0.650 | 0.801 | 1.29 | 0.08 | 10.09 | Thomson et al. (2010) |
| AP36E     | AHe | Marnoso Arenacea Unit   | 44.097 | 11.955 | 0.370 | 0.271 | 9.54 | 0.77 | 12.74 | Thomson et al. (2010) |
| AP37      | AHe | Marnoso Arenacea Unit   | 44.015 | 11.951 | 0.150 | 0.423 | 2.95 | 0.18 | 11.99 | Thomson et al. (2010) |
| AP38      | AHe | Marnoso Arenacea Unit   | 43.797 | 11.914 | 1.200 | 0.858 | 1.97 | 0.12 | 9.81  | Thomson et al. (2010) |
| AP43R1    | AHe | Marnoso Arenacea Unit   | 43.818 | 11.733 | 0.515 | 0.860 | 3.08 | 0.20 | 9.80  | Thomson et al. (2010) |
| AP43R2    | AHe | Marnoso Arenacea Unit   | 43.818 | 11.733 | 0.515 | 0.860 | 3.35 | 0.20 | 9.80  | Thomson et al. (2010) |
| AP44R1    | AHe | Marnoso Arenacea Unit   | 43.824 | 11.746 | 0.725 | 0.868 | 2.02 | 0.12 | 9.76  | Thomson et al. (2010) |
| AP45R1    | AHe | Marnoso Arenacea Unit   | 43.844 | 11.749 | 0.940 | 0.897 | 3.12 | 0.22 | 9.62  | Thomson et al. (2010) |
| AP45R2    | AHe | Marnoso Arenacea Unit   | 43.844 | 11.749 | 0.940 | 0.897 | 1.04 | 0.06 | 9.62  | Thomson et al. (2010) |
| AP47R1    | AHe | Marnoso Arenacea Unit   | 43.864 | 11.739 | 1.365 | 0.906 | 2.33 | 0.14 | 9.57  | Thomson et al. (2010) |
| AP48R1    | AHe | Marnoso Arenacea Unit   | 43.879 | 11.711 | 1.655 | 0.907 | 3.29 | 0.20 | 9.56  | Thomson et al. (2010) |
| AP48R2    | AHe | Marnoso Arenacea Unit   | 43.879 | 11.711 | 1.655 | 0.907 | 3.29 | 0.20 | 9.56  | Thomson et al. (2010) |
| AP5       | AHe | Marnoso Arenacea Unit   | 44.189 | 11.501 | 0.200 | 0.521 | 5.96 | 0.36 | 11.50 | Thomson et al. (2010) |
| AP52      | AHe | Marnoso Arenacea Unit   | 43.905 | 11.791 | 0.565 | 0.836 | 1.92 | 0.12 | 9.92  | Thomson et al. (2010) |
| AP53      | AHe | Marnoso Arenacea Unit   | 43.934 | 11.656 | 0.907 | 0.830 | 5.33 | 0.32 | 9.95  | Thomson et al. (2010) |
| AP54      | AHe | Marnoso Arenacea Unit   | 43.961 | 11.670 | 0.690 | 0.811 | 1.93 | 0.12 | 10.05 | Thomson et al. (2010) |
| AP55      | AHe | Marnoso Arenacea Unit   | 44.013 | 11.687 | 1.070 | 0.722 | 2.08 | 0.12 | 10.49 | Thomson et al. (2010) |
| AP57      | AHe | Marnoso Arenacea Unit   | 43.995 | 11.719 | 0.450 | 0.746 | 1.32 | 0.08 | 10.37 | Thomson et al. (2010) |
| AP5B      | AHe | Marnoso Arenacea Unit   | 44.189 | 11.501 | 0.200 | 0.521 | 2.15 | 0.13 | 11.50 | Thomson et al. (2010) |
| AP5C      | AHe | Marnoso Arenacea Unit   | 44.189 | 11.501 | 0.200 | 0.521 | 1.01 | 0.06 | 11.50 | Thomson et al. (2010) |
| AP5D      | AHe | Marnoso Arenacea Unit   | 44.189 | 11.501 | 0.200 | 0.521 | 2.72 | 0.16 | 11.50 | Thomson et al. (2010) |
| AP8       | AHe | Marnoso Arenacea Unit   | 44.147 | 11.449 | 0.300 | 0.629 | 1.28 | 0.08 | 10.95 | Thomson et al. (2010) |
| AP9       | AHe | Marnoso Arenacea Unit   | 44.115 | 11.431 | 0.400 | 0.674 | 1.37 | 0.08 | 10.73 | Thomson et al. (2010) |
| C1        | AHe | Cervarola Unit          | 44.113 | 11.002 | 0.500 | 0.765 | 3.62 | 0.22 | 10.28 | Thomson et al. (2010) |
| C10       | AHe | Cervarola Unit          | 44.143 | 11.191 | 0.605 | 0.766 | 0.79 | 0.05 | 10.27 | Thomson et al. (2010) |
| C11       | AHe | Cervarola Unit          | 44.001 | 10.807 | 0.950 | 0.667 | 6.11 | 0.37 | 10.77 | Thomson et al. (2010) |
| C13       | AHe | Cervarola Unit          | 44.021 | 10.864 | 0.700 | 0.747 | 3.87 | 0.23 | 10.37 | Thomson et al. (2010) |
| C16       | AHe | Cervarola Unit          | 44.060 | 10.913 | 0.630 | 0.909 | 2.86 | 0.17 | 9.55  | Thomson et al. (2010) |
| C17       | AHe | Cervarola Unit          | 44.068 | 10.919 | 0.625 | 0.921 | 2.80 | 0.17 | 9.49  | Thomson et al. (2010) |
| C2        | AHe | Cervarola Unit          | 44.004 | 11.012 | 0.830 | 0.660 | 3.62 | 0.22 | 10.80 | Thomson et al. (2010) |
| C22       | AHe | Cervarola Unit          | 44.041 | 10.932 | 0.850 | 0.821 | 3.97 | 0.24 | 10.00 | Thomson et al. (2010) |
| C23       | AHe | Cervarola Unit          | 44.021 | 10.929 | 0.884 | 0.719 | 4.27 | 0.26 | 10.51 | Thomson et al. (2010) |
| C29       | AHe | Cervarola Unit          | 44.731 | 9.386  | 0.320 | 0.775 | 2.84 | 0.17 | 10.23 | Thomson et al. (2010) |
| C3        | AHe | Cervarola Unit          | 44.014 | 11.025 | 0.780 | 0.706 | 4.05 | 0.24 | 10.57 | Thomson et al. (2010) |
| C34       | AHe | Cervarola Unit          | 44.417 | 9.949  | 0.510 | 0.855 | 2.73 | 0.16 | 9.83  | Thomson et al. (2010) |
| C37       | AHe | Cervarola Unit          | 44.246 | 10.683 | 0.641 | 1.064 | 1.59 | 0.10 | 8.78  | Thomson et al. (2010) |
| C4        | AHe | Cervarola Unit          | 44.028 | 11.038 | 0.680 | 0.753 | 1.96 | 0.12 | 10.34 | Thomson et al. (2010) |
| C40       | AHe | Cervarola Unit          | 44.223 | 10.758 | 1.250 | 0.980 | 1.73 | 0.10 | 9.20  | Thomson et al. (2010) |
| C5        | AHe | Cervarola Unit          | 44.049 | 11.044 | 0.610 | 0.798 | 3.64 | 0.22 | 10.11 | Thomson et al. (2010) |
| C52A      | AHe | Cervarola Unit          | 44.013 | 11.503 | 0.360 | 0.661 | 3.43 | 0.21 | 10.80 | Thomson et al. (2010) |
| C6        | AHe | Cervarola Unit          | 44.095 | 11.044 | 0.650 | 0.779 | 1.92 | 0.12 | 10.21 | Thomson et al. (2010) |
| C7        | AHe | Cervarola Unit          | 44.111 | 11.039 | 0.625 | 0.755 | 2.05 | 0.12 | 10.33 | Thomson et al. (2010) |
| C8        | AHe | Cervarola Unit          | 44.115 | 11.204 | 0.700 | 0.757 | 1.89 | 0.11 | 10.32 | Thomson et al. (2010) |
| C9        | AHe | Cervarola Unit          | 44.106 | 11.204 | 1.000 | 0.738 | 1.62 | 0.10 | 10.41 | Thomson et al. (2010) |
| CIM1      | AHe | Cervarola Unit (Modino) | 44.194 | 10.699 | 2.165 | 1.174 | 3.35 | 0.20 | 8.23  | Thomson et al. (2010) |
| CIM1R1    | AHe | Cervarola Unit (Modino) | 44.194 | 10.699 | 2.165 | 1.174 | 3.34 | 0.20 | 8.23  | Thomson et al. (2010) |

|         |     |                         |        |        |       |       |      |      |       |                       |
|---------|-----|-------------------------|--------|--------|-------|-------|------|------|-------|-----------------------|
| CIM2    | AHe | Cervarola Unit (Modino) | 44.194 | 10.704 | 2.045 | 1.165 | 2.74 | 0.16 | 8.27  | Thomson et al. (2010) |
| CIM3    | AHe | Cervarola Unit (Modino) | 44.196 | 10.692 | 1.950 | 1.184 | 2.63 | 0.16 | 8.18  | Thomson et al. (2010) |
| CIM3R1  | AHe | Cervarola Unit (Modino) | 44.196 | 10.692 | 1.950 | 1.184 | 3.55 | 0.21 | 8.18  | Thomson et al. (2010) |
| CIM4    | AHe | Cervarola Unit (Modino) | 44.200 | 10.684 | 1.830 | 1.196 | 2.84 | 0.17 | 8.12  | Thomson et al. (2010) |
| CIM4R1  | AHe | Cervarola Unit (Modino) | 44.200 | 10.684 | 1.830 | 1.196 | 2.98 | 0.18 | 8.12  | Thomson et al. (2010) |
| CIM5    | AHe | Cervarola Unit (Modino) | 44.202 | 10.677 | 1.750 | 1.208 | 2.98 | 0.18 | 8.06  | Thomson et al. (2010) |
| CIM5A   | AHe | Cervarola Unit (Modino) | 44.202 | 10.677 | 1.750 | 1.208 | 2.69 | 0.16 | 8.06  | Thomson et al. (2010) |
| CIM5R1  | AHe | Cervarola Unit (Modino) | 44.202 | 10.677 | 1.750 | 1.208 | 2.53 | 0.15 | 8.06  | Thomson et al. (2010) |
| CIM6    | AHe | Cervarola Unit (Modino) | 44.201 | 10.666 | 1.660 | 1.230 | 2.62 | 0.16 | 7.95  | Thomson et al. (2010) |
| CIM6R1  | AHe | Cervarola Unit (Modino) | 44.201 | 10.666 | 1.660 | 1.230 | 2.68 | 0.16 | 7.95  | Thomson et al. (2010) |
| VALD10a | AHe | Macigno Unit            | 43.653 | 11.640 | 1.4   | 0.836 | 3.49 | 0.21 | 9.92  | Thomson et al. (2010) |
| VALD1a  | AHe | Macigno Unit            | 43.594 | 11.603 | 0.497 | 0.471 | 6.94 | 0.42 | 11.75 | Thomson et al. (2010) |
| VALD2a  | AHe | Macigno Unit            | 43.612 | 11.645 | 0.5   | 0.685 | 3.89 | 0.23 | 10.67 | Thomson et al. (2010) |
| VALD2R1 | AHe | Macigno Unit            | 43.612 | 11.645 | 0.5   | 0.685 | 3.87 | 0.23 | 10.67 | Thomson et al. (2010) |
| VALD4a1 | AHe | Macigno Unit            | 43.620 | 11.648 | 0.74  | 0.730 | 3.52 | 0.21 | 10.45 | Thomson et al. (2010) |
| VALD4a2 | AHe | Macigno Unit            | 43.620 | 11.648 | 0.74  | 0.730 | 5.03 | 0.3  | 10.45 | Thomson et al. (2010) |
| VALD4R1 | AHe | Macigno Unit            | 43.620 | 11.648 | 0.74  | 0.730 | 4.01 | 0.24 | 10.45 | Thomson et al. (2010) |
| VALD5a  | AHe | Macigno Unit            | 43.621 | 11.656 | 0.85  | 0.747 | 3.96 | 0.24 | 10.36 | Thomson et al. (2010) |
| VALD5R1 | AHe | Macigno Unit            | 43.621 | 11.656 | 0.85  | 0.747 | 3.92 | 0.23 | 10.36 | Thomson et al. (2010) |
| VALD6a  | AHe | Macigno Unit            | 43.620 | 11.659 | 0.88  | 0.746 | 4.09 | 0.25 | 10.37 | Thomson et al. (2010) |
| VALD6R1 | AHe | Macigno Unit            | 43.620 | 11.659 | 0.88  | 0.746 | 3.86 | 0.23 | 10.37 | Thomson et al. (2010) |
| VALD7a  | AHe | Macigno Unit            | 43.604 | 11.651 | 1.1   | 0.658 | 3.75 | 0.22 | 10.81 | Thomson et al. (2010) |
| VALD8R1 | AHe | Macigno Unit            | 43.626 | 11.684 | 1.2   | 0.782 | 4.11 | 0.25 | 10.19 | Thomson et al. (2010) |
| VALD8R2 | AHe | Macigno Unit            | 43.626 | 11.684 | 1.2   | 0.782 | 3.46 | 0.21 | 10.19 | Thomson et al. (2010) |

\*Lithologies exposed in the Alpi Apuane metamorphic dome. These samples were excluded from the erosion rate analysis



**Supplementary Table 2 Compilation of bedrock AFT cooling ages and sample descriptions.**

| ID         | Method | Lithology                            | Latitude | Longitude | Sample Elevation (km) | Mean Elevation (km) | Age (Ma) | Error (1σ) | Surface Temperature (°C) | Reference                 |
|------------|--------|--------------------------------------|----------|-----------|-----------------------|---------------------|----------|------------|--------------------------|---------------------------|
| AR1        | AFT    | Pseudomacigno Apuan autochthon*      | 44.058   | 10.226    | 0.840                 | 0.607               | 4.71     | 0.59       | 11.06                    | Abbate et al. (1994)      |
| (AR2A)a    | AFT    | Pseudomacigno Apuan autochthon*      | 44.055   | 10.256    | 0.840                 | 0.634               | 5.24     | 0.63       | 10.93                    | Abbate et al. (1994)      |
| AR3        | AFT    | Pseudomacigno Apuan autochthon*      | 44.055   | 10.256    | 0.840                 | 0.634               | 4.95     | 0.58       | 10.93                    | Abbate et al. (1994)      |
| BT1        | AFT    | graywacke                            | 44.085   | 9.787     | 0.475                 | 0.104               | 4.58     | 0.78       | 13.58                    | Abbate et al. (1994)      |
| BT2        | AFT    | graywacke                            | 44.085   | 9.787     | 0.525                 | 0.104               | 4.73     | 0.55       | 13.58                    | Abbate et al. (1994)      |
| CB3        | AFT    | granite cgl                          | 44.051   | 9.830     | 0.000                 | 0.079               | 8.11     | 1.19       | 13.70                    | Abbate et al. (1994)      |
| CB4        | AFT    | gneiss cgl                           | 44.051   | 9.830     | 0.000                 | 0.079               | 8.46     | 0.42       | 13.70                    | Abbate et al. (1994)      |
| CB5        | AFT    | graywacke                            | 44.051   | 9.830     | 0.000                 | 0.079               | 7.13     | 0.67       | 13.70                    | Abbate et al. (1994)      |
| CP1        | AFT    | Hercynian Basement*                  | 44.028   | 10.264    | 0.675                 | 0.554               | 3.93     | 0.36       | 11.33                    | Abbate et al. (1994)      |
| CP3        | AFT    | Apuan autochthon*                    | 44.017   | 10.264    | 0.650                 | 0.554               | 3.64     | 0.71       | 11.33                    | Abbate et al. (1994)      |
| FC3        | AFT    | Pseudomacigno Apuan autochthon*      | 44.078   | 10.267    | 1.620                 | 0.701               | 5.59     | 0.61       | 10.59                    | Abbate et al. (1994)      |
| FC5        | AFT    | Pseudomacigno Apuan autochthon*      | 44.078   | 10.267    | 1.620                 | 0.701               | 5.95     | 0.59       | 10.59                    | Abbate et al. (1994)      |
| FO1        | AFT    | Pseudomacigno Apuan autochthon*      | 44.036   | 10.375    | 0.450                 | 0.619               | 1.96     | 0.56       | 11.00                    | Abbate et al. (1994)      |
| FO4        | AFT    | Pseudomacigno Apuan autochthon*      | 44.033   | 10.375    | 0.425                 | 0.610               | 1.91     | 0.31       | 11.05                    | Abbate et al. (1994)      |
| FO5        | AFT    | Pseudomacigno Apuan autochthon*      | 44.044   | 10.388    | 0.460                 | 0.636               | 1.63     | 0.25       | 10.92                    | Abbate et al. (1994)      |
| G2         | AFT    | Hercynian Basement Apuan autochthon* | 44.069   | 10.193    | 0.170                 | 0.571               | 3.96     | 0.36       | 11.24                    | Abbate et al. (1994)      |
| MD1 (MAD1) | AFT    | Hercynian Basement*                  | 44.040   | 10.192    | 0.787                 | 0.502               | 3.86     | 0.77       | 11.59                    | Abbate et al. (1994)      |
| ROM1       | AFT    | Marnoso Arenacea Unit                | 44.002   | 11.472    | 0.890                 | 0.562               | 5.50     | 1.10       | 11.29                    | Balestrieri et al. (2018) |
| ROM2       | AFT    | Marnoso Arenacea Unit                | 44.001   | 11.472    | 0.760                 | 0.560               | 5.00     | 0.70       | 11.30                    | Balestrieri et al. (2018) |
| ROM3       | AFT    | Marnoso Arenacea Unit                | 44.000   | 11.475    | 0.675                 | 0.560               | 3.90     | 1.00       | 11.30                    | Balestrieri et al. (2018) |
| ROM4       | AFT    | Marnoso Arenacea Unit                | 43.998   | 11.477    | 0.575                 | 0.563               | 4.00     | 1.00       | 11.28                    | Balestrieri et al. (2018) |
| ROM5       | AFT    | Marnoso Arenacea Unit                | 43.994   | 11.477    | 0.480                 | 0.562               | 6.60     | 1.40       | 11.29                    | Balestrieri et al. (2018) |
| TCGA       | AFT    | Marnoso Arenacea Unit                | 43.993   | 11.476    | 0.360                 | 0.560               | 5.00     | 1.60       | 11.30                    | Balestrieri et al. (2018) |
| CAS1       | AFT    | Macigno Unit                         | 44.206   | 10.446    | 1.300                 | 1.061               | 8.93     | 1.34       | 8.79                     | Balestrieri (2000)        |
| CAS2       | AFT    | Macigno Unit                         | 44.174   | 10.424    | 0.965                 | 0.980               | 9.19     | 1.43       | 9.20                     | Balestrieri (2000)        |
| CAST2      | AFT    | Macigno Unit                         | 44.105   | 10.415    | 0.270                 | 0.811               | 8.91     | 1.30       | 10.04                    | Balestrieri (2000)        |
| CAST3      | AFT    | Macigno Unit                         | 44.105   | 10.415    | 0.240                 | 0.811               | 8.21     | 1.00       | 10.04                    | Balestrieri (2000)        |
| GOM2       | AFT    | Macigno Unit                         | 44.125   | 10.642    | 1.850                 | 1.061               | 9.51     | 1.40       | 8.79                     | Balestrieri (2000)        |
| GOM3       | AFT    | Macigno Unit                         | 44.134   | 10.656    | 1.300                 | 1.096               | 6.19     | 0.86       | 8.62                     | Balestrieri (2000)        |
| BOR2       | AFT    | Gottero Sandstone                    | 44.4352  | 9.425     | 0.452                 | 0.779               | 7.50     | 1.00       | 10.20                    | Balestrieri et al. (1996) |
| BOR1       | AFT    | Gottero Sandstone                    | 44.4352  | 9.425     | 0.450                 | 0.779               | 6.40     | 1.00       | 10.20                    | Balestrieri et al. (1996) |
| MG3        | AFT    | Gottero Sandstone                    | 44.2345  | 9.472     | 0.000                 | 0.193               | 9.70     | 1.10       | 13.13                    | Balestrieri et al. (1996) |
| MS1        | AFT    | Gottero Sandstone                    | 44.1338  | 9.638     | 0.000                 | 0.136               | 9.70     | 1.10       | 13.42                    | Balestrieri et al. (1996) |
| MS2        | AFT    | Gottero Sandstone                    | 44.1338  | 9.638     | 0.000                 | 0.136               | 7.60     | 0.70       | 13.42                    | Balestrieri et al. (1996) |
| MS4        | AFT    | Gottero Sandstone                    | 44.1338  | 9.638     | 0.000                 | 0.136               | 8.00     | 1.20       | 13.42                    | Balestrieri et al. (1996) |
| MS5        | AFT    | Gottero Sandstone                    | 44.1338  | 9.638     | 0.000                 | 0.136               | 8.70     | 1.20       | 13.42                    | Balestrieri et al. (1996) |
| RAM1       | AFT    | Gottero Sandstone                    | 44.434   | 9.311     | 1.318                 | 0.632               | 8.60     | 1.10       | 10.94                    | Balestrieri et al. (1996) |
| RAM3       | AFT    | Gottero Sandstone                    | 44.4268  | 9.312     | 1.075                 | 0.606               | 6.50     | 1.10       | 11.07                    | Balestrieri et al. (1996) |
| RAM4       | AFT    | Gottero Sandstone                    | 44.4268  | 9.312     | 1.075                 | 0.606               | 7.50     | 1.00       | 11.07                    | Balestrieri et al. (1996) |
| RAM5       | AFT    | Gottero Sandstone                    | 44.4221  | 9.311     | 0.950                 | 0.587               | 7.30     | 0.80       | 11.17                    | Balestrieri et al. (1996) |
| RAM6       | AFT    | Gottero Sandstone                    | 44.4221  | 9.311     | 0.948                 | 0.587               | 6.50     | 0.70       | 11.17                    | Balestrieri et al. (1996) |
| ZAT2       | AFT    | Gottero Sandstone                    | 44.3908  | 9.442     | 1.349                 | 0.637               | 9.50     | 1.30       | 10.92                    | Balestrieri et al. (1996) |
| CH1        | AFT    | Macigno Unit                         | 43.601   | 11.411    | 0.303                 | 0.337               | 5.60     | 0.90       | 12.42                    | Bonini et al. (2013)      |
| CH2        | AFT    | Macigno Unit                         | 43.541   | 11.430    | 0.504                 | 0.379               | 6.10     | 1.00       | 12.20                    | Bonini et al. (2013)      |
| CH3        | AFT    | Macigno Unit                         | 43.565   | 11.382    | 0.722                 | 0.373               | 6.90     | 0.90       | 12.24                    | Bonini et al. (2013)      |
| CH4        | AFT    | Macigno Unit                         | 43.562   | 11.380    | 0.857                 | 0.376               | 7.40     | 1.00       | 12.22                    | Bonini et al. (2013)      |
| PR 11      | AFT    | Subligurian                          | 44.463   | 9.930     | 0.880                 | 0.808               | 8.70     | 1.10       | 10.06                    | Carlini et al. (2013)     |
| PR 12      | AFT    | Tuscan Nappe                         | 44.353   | 9.776     | 0.668                 | 0.700               | 8.70     | 1.20       | 10.60                    | Carlini et al. (2013)     |
| PR 15      | AFT    | Ligurian                             | 44.472   | 9.966     | 1.085                 | 0.837               | 7.30     | 1.90       | 9.92                     | Carlini et al. (2013)     |
| PR 17      | AFT    | Ligurian                             | 44.379   | 10.196    | 0.860                 | 1.001               | 4.10     | 0.50       | 9.10                     | Carlini et al. (2013)     |
| PR 18      | AFT    | Subligurian                          | 44.380   | 10.194    | 0.780                 | 1.001               | 4.60     | 0.80       | 9.10                     | Carlini et al. (2013)     |
| PR 20      | AFT    | Tusc.                                | 44.338   | 10.528    | 0.500                 | 0.881               | 2.30     | 0.30       | 9.69                     | Carlini et al. (2013)     |
| PR 22      | AFT    | Subligurian                          | 44.331   | 10.564    | 1.082                 | 0.851               | 2.50     | 0.50       | 9.84                     | Carlini et al. (2013)     |
| PR 23.1    | AFT    | Ligurian                             | 44.329   | 10.562    | 1.111                 | 0.861               | 4.70     | 0.90       | 9.79                     | Carlini et al. (2013)     |
| PR 25.1    | AFT    | Tuscan Nappe                         | 44.320   | 9.995     | 0.248                 | 0.639               | 7.00     | 0.90       | 10.91                    | Carlini et al. (2013)     |
| PR 26      | AFT    | Tuscan Nappe                         | 44.463   | 9.602     | 1.135                 | 0.883               | 5.40     | 0.90       | 9.68                     | Carlini et al. (2013)     |
| PR 27      | AFT    | Epiligurian                          | 44.525   | 9.824     | 0.618                 | 0.726               | 4.70     | 1.00       | 10.47                    | Carlini et al. (2013)     |
| PR 28.1    | AFT    | Ligurian                             | 44.522   | 9.931     | 0.710                 | 0.776               | 3.20     | 0.50       | 10.22                    | Carlini et al. (2013)     |
| PR 28.2    | AFT    | Ligurian                             | 44.522   | 9.931     | 0.702                 | 0.776               | 4.10     | 0.60       | 10.22                    | Carlini et al. (2013)     |
| PR 3       | AFT    | Tuscan Nappe                         | 44.446   | 9.943     | 0.600                 | 0.817               | 6.20     | 1.00       | 10.01                    | Carlini et al. (2013)     |

|           |     |                         |        |        |       |       |      |      |       |                       |
|-----------|-----|-------------------------|--------|--------|-------|-------|------|------|-------|-----------------------|
| PR 5      | AFT | Ligurian                | 44.456 | 9.804  | 0.718 | 0.777 | 7.80 | 0.80 | 10.21 | Carlini et al. (2013) |
| PR 6.1    | AFT | Subligurian             | 44.456 | 9.783  | 0.600 | 0.789 | 4.30 | 0.90 | 10.15 | Carlini et al. (2013) |
| PR 7      | AFT | Subligurian             | 44.550 | 9.940  | 0.301 | 0.748 | 4.90 | 1.00 | 10.36 | Carlini et al. (2013) |
| 03GB07    | AFT | Macigno Unit            | 44.124 | 10.059 | 0.675 | 0.356 | 7.90 | 0.90 | 12.32 | Felin et al. (2007)   |
| 03RE20    | AFT | Macigno Unit            | 44.098 | 10.326 | 1.055 | 0.760 | 7.50 | 1.00 | 10.30 | Felin et al. (2007)   |
| MSV 2     | AFT | Pseudomacigno Apuan*    | 44.106 | 10.288 | 0.654 | 0.752 | 5.70 | 0.75 | 10.34 | Felin et al. (2007)   |
| S 1       | AFT | Macigno Unit            | 44.178 | 10.160 | 0.546 | 0.662 | 6.50 | 0.95 | 10.79 | Felin et al. (2007)   |
| S 3       | AFT | Macigno Unit            | 44.139 | 10.073 | 0.494 | 0.374 | 6.60 | 0.85 | 12.23 | Felin et al. (2007)   |
| S 4       | AFT | Macigno Unit            | 44.128 | 10.059 | 0.636 | 0.330 | 5.10 | 0.85 | 12.45 | Felin et al. (2007)   |
| SC 2      | AFT | Macigno Unit            | 44.081 | 10.083 | 0.204 | 0.342 | 6.40 | 1.10 | 12.39 | Felin et al. (2007)   |
| SM 3      | AFT | Macigno Unit            | 44.164 | 10.129 | 0.250 | 0.558 | 8.80 | 1.40 | 11.31 | Felin et al. (2007)   |
| SU 1      | AFT | Macigno Unit            | 44.170 | 10.188 | 0.773 | 0.724 | 6.50 | 1.05 | 10.48 | Felin et al. (2007)   |
| 050320-1a | AFT | Helminthoid Flysch      | 44.263 | 10.664 | 1.112 | 0.976 | 7.30 | 2.30 | 9.22  | Thomson et al. (2010) |
| 050320-1b | AFT | Helminthoid Flysch      | 44.263 | 10.664 | 1.112 | 0.976 | 5.00 | 1.30 | 9.22  | Thomson et al. (2010) |
| CIM1      | AFT | Cervarola Unit (Modino) | 44.194 | 10.699 | 2.165 | 1.121 | 7.53 | NA   | 8.50  | Thomson et al. (2010) |
| CIM2      | AFT | Cervarola Unit (Modino) | 44.194 | 10.704 | 2.045 | 1.116 | 7.84 | NA   | 8.52  | Thomson et al. (2010) |
| CIM3      | AFT | Cervarola Unit (Modino) | 44.196 | 10.692 | 1.950 | 1.124 | 7.44 | NA   | 8.48  | Thomson et al. (2010) |
| CIM4      | AFT | Cervarola Unit (Modino) | 44.200 | 10.684 | 1.830 | 1.128 | 6.68 | NA   | 8.46  | Thomson et al. (2010) |
| CIM5      | AFT | Cervarola Unit (Modino) | 44.202 | 10.677 | 1.750 | 1.134 | 7.22 | NA   | 8.43  | Thomson et al. (2010) |
| CIM6      | AFT | Cervarola Unit (Modino) | 44.201 | 10.666 | 1.660 | 1.149 | 6.60 | NA   | 8.35  | Thomson et al. (2010) |
| SILL1     | AFT | Macigno Unit            | 44.368 | 10.064 | 1.861 | 0.860 | 8.70 | NA   | 9.80  | Thomson et al. (2010) |
| SILL10    | AFT | Macigno Unit            | 44.334 | 10.050 | 0.730 | 0.754 | 7.10 | NA   | 10.33 | Thomson et al. (2010) |
| SILL2     | AFT | Macigno Unit            | 44.361 | 10.074 | 1.790 | 0.863 | 9.60 | NA   | 9.78  | Thomson et al. (2010) |
| SILL3     | AFT | Macigno Unit            | 44.357 | 10.073 | 1.600 | 0.853 | 6.60 | NA   | 9.84  | Thomson et al. (2010) |
| SILL4     | AFT | Macigno Unit            | 44.455 | 10.076 | 1.530 | 0.951 | 5.80 | NA   | 9.34  | Thomson et al. (2010) |
| SILL5     | AFT | Macigno Unit            | 44.354 | 10.071 | 1.420 | 0.843 | 6.80 | NA   | 9.89  | Thomson et al. (2010) |
| SILL6     | AFT | Macigno Unit            | 44.353 | 10.057 | 1.260 | 0.815 | 6.80 | NA   | 10.03 | Thomson et al. (2010) |
| SILL7     | AFT | Macigno Unit            | 44.338 | 10.058 | 1.130 | 0.781 | 6.10 | NA   | 10.19 | Thomson et al. (2010) |
| SILL9     | AFT | Macigno Unit            | 44.334 | 10.050 | 0.780 | 0.755 | 5.30 | NA   | 10.32 | Thomson et al. (2010) |
| VALD1     | AFT | Macigno Unit            | 43.594 | 11.603 | 0.497 | 0.484 | 4.97 | NA   | 11.68 | Thomson et al. (2010) |
| VALD10    | AFT | Macigno Unit            | 43.653 | 11.640 | 1.400 | 0.836 | 7.33 | NA   | 9.92  | Thomson et al. (2010) |
| VALD11    | AFT | Macigno Unit            | 43.663 | 11.641 | 1.450 | 0.644 | 6.12 | NA   | 10.88 | Thomson et al. (2010) |
| VALD12    | AFT | Macigno Unit            | 43.696 | 11.673 | 0.960 | 0.717 | 6.63 | NA   | 10.51 | Thomson et al. (2010) |
| VALD2     | AFT | Macigno Unit            | 43.612 | 11.645 | 0.500 | 0.550 | 7.35 | NA   | 11.35 | Thomson et al. (2010) |
| VALD3     | AFT | Macigno Unit            | 43.614 | 11.656 | 0.580 | 0.559 | 6.73 | NA   | 11.31 | Thomson et al. (2010) |
| VALD4     | AFT | Macigno Unit            | 43.620 | 11.648 | 0.740 | 0.567 | 5.35 | NA   | 11.27 | Thomson et al. (2010) |
| VALD5     | AFT | Macigno Unit            | 43.621 | 11.656 | 0.850 | 0.572 | 4.43 | NA   | 11.24 | Thomson et al. (2010) |
| VALD6     | AFT | Macigno Unit            | 43.620 | 11.659 | 0.880 | 0.571 | 6.83 | NA   | 11.25 | Thomson et al. (2010) |
| VALD7     | AFT | Macigno Unit            | 43.604 | 11.651 | 1.100 | 0.536 | 6.88 | NA   | 11.42 | Thomson et al. (2010) |
| VALD8     | AFT | Macigno Unit            | 43.626 | 11.684 | 1.200 | 0.585 | 8.84 | NA   | 11.18 | Thomson et al. (2010) |
| VALD9     | AFT | Macigno Unit            | 43.646 | 11.652 | 1.200 | 0.619 | 8.58 | NA   | 11.00 | Thomson et al. (2010) |
| C1        | AFT | Cervarola Unit          | 44.113 | 11.002 | 0.500 | 0.789 | 6.70 | 0.08 | 10.15 | Ventura et al. (2001) |
| C10       | AFT | Cervarola Unit          | 44.143 | 11.191 | 0.605 | 0.683 | 3.90 | 0.80 | 10.68 | Ventura et al. (2001) |
| C11       | AFT | Macigno Unit            | 44.001 | 10.807 | 0.950 | 0.644 | 9.80 | 1.20 | 10.88 | Ventura et al. (2001) |
| C13       | AFT | Modino                  | 44.021 | 10.864 | 0.700 | 0.731 | 6.80 | 0.90 | 10.45 | Ventura et al. (2001) |
| C16       | AFT | Cervarola Unit          | 44.060 | 10.913 | 0.630 | 0.807 | 2.70 | 0.80 | 10.07 | Ventura et al. (2001) |
| C17       | AFT | Cervarola Unit          | 44.068 | 10.919 | 0.625 | 0.818 | 4.90 | 1.20 | 10.01 | Ventura et al. (2001) |
| C2        | AFT | Cervarola Unit          | 44.004 | 11.012 | 0.830 | 0.548 | 6.50 | 0.80 | 11.36 | Ventura et al. (2001) |
| C22       | AFT | Cervarola Unit          | 44.041 | 10.932 | 0.850 | 0.747 | 3.00 | 1.10 | 10.36 | Ventura et al. (2001) |
| C23       | AFT | Cervarola Unit          | 44.021 | 10.929 | 0.884 | 0.689 | 5.20 | 1.00 | 10.65 | Ventura et al. (2001) |
| C29       | AFT | Cervarola Unit          | 44.731 | 9.386  | 0.320 | 0.804 | 4.70 | NA   | 10.08 | Ventura et al. (2001) |
| C3        | AFT | Cervarola Unit          | 44.014 | 11.025 | 0.780 | 0.580 | 5.00 | 0.05 | 11.20 | Ventura et al. (2001) |
| C34       | AFT | Cervarola Unit          | 44.417 | 9.949  | 0.510 | 0.820 | 8.60 | NA   | 10.00 | Ventura et al. (2001) |
| C37       | AFT | Cervarola Unit          | 44.246 | 10.683 | 0.641 | 1.016 | 2.60 | 0.50 | 9.02  | Ventura et al. (2001) |
| C38       | AFT | Cervarola Unit          | 44.223 | 10.777 | 0.980 | 0.950 | 3.10 | 1.10 | 9.35  | Ventura et al. (2001) |
| C4        | AFT | Cervarola Unit          | 44.028 | 11.038 | 0.680 | 0.620 | 3.30 | 0.50 | 11.00 | Ventura et al. (2001) |
| C40       | AFT | Cervarola Unit          | 44.223 | 10.758 | 1.250 | 0.977 | 4.10 | 0.50 | 9.22  | Ventura et al. (2001) |
| C5        | AFT | Cervarola Unit          | 44.049 | 11.044 | 0.610 | 0.679 | 5.70 | 0.60 | 10.71 | Ventura et al. (2001) |
| C52       | AFT | Cervarola Unit          | 44.013 | 11.503 | 0.360 | 0.594 | 5.90 | 1.10 | 11.13 | Ventura et al. (2001) |
| C6        | AFT | Cervarola Unit          | 44.095 | 11.044 | 0.650 | 0.735 | 5.00 | 0.60 | 10.42 | Ventura et al. (2001) |
| C7        | AFT | Cervarola Unit          | 44.111 | 11.039 | 0.625 | 0.738 | 5.40 | 0.70 | 10.41 | Ventura et al. (2001) |
| C8        | AFT | Cervarola Unit          | 44.115 | 11.207 | 0.700 | 0.680 | 6.20 | 0.60 | 10.70 | Ventura et al. (2001) |
| C9        | AFT | Cervarola Unit          | 44.106 | 11.204 | 1.000 | 0.673 | 7.40 | 0.70 | 10.73 | Ventura et al. (2001) |
| 1927      | AFT | Marnoso Arenacea Unit   | 44.064 | 11.597 | 0.350 | 0.667 | 8.50 | NA   | 10.77 | Zattin et al. (2002)  |

|       |     |                       |        |        |       |       |      |      |       |                      |
|-------|-----|-----------------------|--------|--------|-------|-------|------|------|-------|----------------------|
| 1929  | AFT | Marnoso Arenacea Unit | 44.037 | 11.504 | 0.700 | 0.619 | 6.40 | 0.70 | 11.00 | Zattin et al. (2002) |
| 1930  | AFT | Marnoso Arenacea Unit | 44.069 | 11.492 | 1.150 | 0.630 | 4.70 | NA   | 10.95 | Zattin et al. (2002) |
| AP 10 | AFT | Marnoso Arenacea Unit | 44.121 | 11.396 | 0.500 | 0.685 | 3.90 | 0.70 | 10.67 | Zattin et al. (2002) |
| Ap 15 | AFT | Marnoso Arenacea Unit | 43.819 | 11.952 | 0.700 | 0.805 | 9.20 | 1.40 | 10.07 | Zattin et al. (2002) |
| AP 34 | AFT | Macigno Unit          | 44.097 | 11.315 | 0.600 | 0.653 | 5.90 | 0.80 | 10.83 | Zattin et al. (2002) |
| AP 43 | AFT | Marnoso Arenacea      | 43.818 | 11.733 | 0.515 | 0.805 | 5.30 | 0.80 | 10.08 | Zattin et al. (2002) |
| AP 45 | AFT | Marnoso Arenacea      | 43.828 | 11.749 | 0.940 | 0.809 | 4.70 | 0.70 | 10.06 | Zattin et al. (2002) |
| AP 52 | AFT | Marnoso Arenacea Unit | 43.905 | 11.723 | 0.565 | 0.799 | 5.10 | 0.80 | 10.11 | Zattin et al. (2002) |
| AP 53 | AFT | Marnoso Arenacea Unit | 43.934 | 11.656 | 0.907 | 0.814 | 8.60 | 1.10 | 10.03 | Zattin et al. (2002) |
| AP 54 | AFT | Marnoso Arenacea      | 43.961 | 11.670 | 0.690 | 0.747 | 5.60 | 0.70 | 10.36 | Zattin et al. (2002) |
| AP 55 | AFT | Marnoso Arenacea Unit | 44.013 | 11.687 | 1.070 | 0.672 | 7.90 | 0.80 | 10.74 | Zattin et al. (2002) |
| AP 56 | AFT | Marnoso Arenacea Unit | 43.983 | 11.686 | 0.500 | 0.723 | 4.10 | 0.70 | 10.49 | Zattin et al. (2002) |
| AP 57 | AFT | Marnoso Arenacea Unit | 43.995 | 11.719 | 0.450 | 0.688 | 3.60 | 0.50 | 10.66 | Zattin et al. (2002) |
| AP 9  | AFT | Marnoso Arenacea Unit | 44.115 | 11.431 | 0.400 | 0.673 | 3.90 | 0.70 | 10.73 | Zattin et al. (2002) |
| AP44  | AFT | Marnoso Arenacea Unit | 43.824 | 11.746 | 0.725 | 0.807 | 6.00 | 0.90 | 10.07 | Zattin et al. (2002) |
| AP47  | AFT | Marnoso Arenacea      | 43.864 | 11.739 | 1.365 | 0.816 | 5.20 | 0.90 | 10.02 | Zattin et al. (2002) |

\*Lithologies exposed in the Alpi Apuane metamorphic dome. These samples were excluded from the erosion rate inversions

**Supplementary Table 3 Compilation of detrital AFT cooling ages and sample descriptions.**

| ID       | Method | Lithology                      | Latitude | Longitude | Sample<br>Elevation (km) | Age<br>(Ma) | Error (2 $\sigma$ ) | Error (1 $\sigma$ ) | Reference                     |
|----------|--------|--------------------------------|----------|-----------|--------------------------|-------------|---------------------|---------------------|-------------------------------|
| Enza     | AFT    | Ligurian/EpiLigurian/Macigno   | 44.620   | 10.413    | 0.163                    | 4.70        | 1.00                | 0.50                | Malusa and Balestrieri (2012) |
| Nure     | AFT    | Ligurian                       | 44.872   | 9.647     | 0.208                    | 4.10        | 1.60                | 0.80                | Malusa and Balestrieri (2012) |
| Panaro   | AFT    | Ligurian/EpiLigurian/Macigno   | 44.477   | 11.027    | 0.099                    | 6.90        | 2.20                | 1.10                | Malusa and Balestrieri (2012) |
| Secchia  | AFT    | Ligurian/EpiLigurian/Macigno   | 44.532   | 10.758    | 0.119                    | 6.50        | 1.80                | 0.90                | Malusa and Balestrieri (2012) |
| Taro     | AFT    | Ligurian/ EpiLigurian          | 44.713   | 10.120    | 0.117                    | 4.60        | 1.60                | 0.80                | Malusa and Balestrieri (2012) |
| Trebbia  | AFT    | Ligurian                       | 44.901   | 9.584     | 0.140                    | 4.00        | 1.40                | 0.70                | Malusa and Balestrieri (2012) |
| Bisenzio | AFT    | Cervarola and Modino Units     | 43.928   | 11.126    | 0.102                    | 5.30        | 0.95                | 0.50                | <i>this study</i>             |
| Lima1    | AFT    | Cervarola/Modino/Macigno Units | 44.000   | 10.560    | 0.097                    | 5.40        | 1.15                | 0.60                | <i>this study</i>             |
| Lima2    | AFT    | Cervarola/Modino/Macigno Units | 44.091   | 10.760    | 0.544                    | 6.10        | 0.85                | 0.45                | <i>this study</i>             |
| Magra1   | AFT    | Ligurian and Macigno Units     | 44.188   | 9.925     | 0.036                    | 5.10        | 3.10                | 1.50                | <i>this study</i>             |
| Magra2   | AFT    | Macigno and Ligurian Units     | 44.387   | 9.887     | 0.251                    | 5.20        | 1.00                | 0.50                | <i>this study</i>             |
| Pescia   | AFT    | Macigno Unit                   | 43.929   | 10.693    | 0.105                    | 8.00        | 1.00                | 0.50                | <i>this study</i>             |
| Serchio  | AFT    | Macigno Unit                   | 44.192   | 10.306    | 0.525                    | 7.50        | 1.05                | 0.50                | <i>this study</i>             |
| Vara     | AFT    | Ligurian and Macigno Units     | 44.198   | 9.851     | 0.032                    | 5.90        | 2.50                | 1.25                | <i>this study</i>             |

**Supplementary Table 4 Compilation of bedrock ZHe cooling ages and sample descriptions.**

| ID           | Metho<br>d | Lithology                         | Latitude | Longitud<br>e | Sample<br>Elevatio<br>n (km) | Age<br>(Ma) | Error<br>(2 $\sigma$ ) | Mean<br>Elevatio<br>n (km) | Surface<br>Temperatu<br>re (°C) | Reference            |
|--------------|------------|-----------------------------------|----------|---------------|------------------------------|-------------|------------------------|----------------------------|---------------------------------|----------------------|
| CP3(4)       | ZHe        | Hercynian Basement Apuan autoch.* | 44.017   | 10.264        | 0.650                        | 4.98        | 0.40                   | 0.405                      | 12.075                          | Abbate et al. (1994) |
| G3(4) (G3A)a | ZHe        | Hercynian Basement Apuan autoch.* | 44.067   | 10.199        | 0.170                        | 5.7         | 0.46                   | 0.451                      | 11.843                          | Abbate et al. (1994) |
| 020620-1     | ZHe        | PseudoMacigno Unit/Apuan autoch.* | 44.096   | 10.325        | 0.958                        | 3.61        | 0.29                   | 0.708                      | 10.560                          | Fellin et al. (2007) |
| 020620-3     | ZHe        | Macigno Unit                      | 44.122   | 10.068        | 0.756                        | 9.35        | 0.75                   | 0.395                      | 12.125                          | Fellin et al. (2007) |
| 020620-3 rep | ZHe        | Macigno Unit                      | 44.122   | 10.068        | 0.756                        | 9.27        | 0.74                   | 0.395                      | 12.125                          | Fellin et al. (2007) |
| 03AP38       | ZHe        | Met. Mesozoic succ. Massa Unit*   | 44.069   | 10.139        | 0.925                        | 5.94        | 0.47                   | 0.392                      | 12.140                          | Fellin et al. (2007) |
| 03AP41       | ZHe        | Hercynian Basement Massa Unit*    | 44.050   | 10.161        | 0.080                        | 6.44        | 0.52                   | 0.387                      | 12.164                          | Fellin et al. (2007) |
| 03AP42       | ZHe        | Hercynian Basement Apuan autoch.* | 44.069   | 10.175        | 0.125                        | 7.19        | 0.58                   | 0.430                      | 11.949                          | Fellin et al. (2007) |
| 03AP43       | ZHe        | Hercynian Basement Massa Unit*    | 44.048   | 10.179        | 0.505                        | 5.11        | 0.41                   | 0.399                      | 12.104                          | Fellin et al. (2007) |
| 03AP45       | ZHe        | Hercynian Basement Massa Unit*    | 44.032   | 10.194        | 0.810                        | 5.93        | 0.47                   | 0.386                      | 12.172                          | Fellin et al. (2007) |
| 03AP47       | ZHe        | PseudoMacigno Unit/Apuan autoch.* | 44.128   | 10.259        | 0.890                        | 4.62        | 0.37                   | 0.693                      | 10.634                          | Fellin et al. (2007) |
| 03AP58       | ZHe        | PseudoMacigno Unit/Apuan autoch.* | 44.003   | 10.308        | 0.305                        | 4.33        | 0.35                   | 0.410                      | 12.050                          | Fellin et al. (2007) |
| 03GB02       | ZHe        | Hercynian Basement Apuan autoch.* | 43.995   | 10.248        | 0.080                        | 5.41        | 0.43                   | 0.356                      | 12.318                          | Fellin et al. (2007) |
| 03GB04       | ZHe        | PseudoMacigno Unit/Apuan autoch.* | 43.974   | 10.277        | 0.600                        | 6.93        | 0.55                   | 0.333                      | 12.434                          | Fellin et al. (2007) |
| 03GB06       | ZHe        | PseudoMacigno Unit/Apuan autoch.* | 43.966   | 10.330        | 0.440                        | 5.98        | 0.48                   | 0.348                      | 12.358                          | Fellin et al. (2007) |
| 03GB12       | ZHe        | PseudoMacigno Unit/Apuan autoch.* | 44.013   | 10.303        | 0.670                        | 5.09        | 0.41                   | 0.428                      | 11.958                          | Fellin et al. (2007) |
| 03RE17       | ZHe        | Hercynian Basement Apuan autoch.* | 44.036   | 10.253        | 0.799                        | 5.29        | 0.42                   | 0.437                      | 11.917                          | Fellin et al. (2007) |
| 03RE21       | ZHe        | PseudoMacigno Unit/Apuan autoch.* | 44.075   | 10.327        | 0.810                        | 6.40        | 0.51                   | 0.645                      | 10.875                          | Fellin et al. (2007) |
| 03RE22       | ZHe        | PseudoMacigno Unit/Apuan autoch.* | 44.066   | 10.324        | 0.510                        | 4.77        | 0.38                   | 0.611                      | 11.043                          | Fellin et al. (2007) |
| 03RE24       | ZHe        | PseudoMacigno Unit/Apuan autoch.* | 44.159   | 10.200        | 0.915                        | 5.58        | 0.45                   | 0.666                      | 10.771                          | Fellin et al. (2007) |
| 03RE25A      | ZHe        | Hercynian Basement Apuan autoch.* | 44.133   | 10.186        | 1.500                        | 5.42        | 0.43                   | 0.582                      | 11.190                          | Fellin et al. (2007) |
| 03RE27       | ZHe        | Hercynian Basment Massa Unit*     | 44.071   | 10.155        | 0.500                        | 5.54        | 0.44                   | 0.412                      | 12.040                          | Fellin et al. (2007) |
| APUANE-1z1   | ZHe        | Hercynian Basement Apuan autoch.* | 44.024   | 10.243        | 0.845                        | 4.81        | 0.38                   | 0.404                      | 12.081                          | Fellin et al. (2007) |
| APUANE-1z2   | ZHe        | Hercynian Basement Apuan autoch.* | 44.024   | 10.243        | 0.845                        | 4.58        | 0.37                   | 0.404                      | 12.081                          | Fellin et al. (2007) |
| FIO4z2       | ZHe        | PseudoMacigno Unit/Apuan autoch.* | 44.077   | 10.265        | 1.450                        | 4.92        | 0.39                   | 0.560                      | 11.301                          | Fellin et al. (2007) |
| FO4A         | ZHe        | PseudoMacigno Unit/Apuan autoch.* | 44.033   | 10.375        | 0.450                        | 5.86        | 0.47                   | 0.576                      | 11.219                          | Fellin et al. (2007) |

\*Lithologies exposed in the Alpi Apuane metamorphic dome. These samples were excluded from the erosion rate inversions

**Supplementary Table 5 Erosion rates and parameters for AHe bedrock samples.**

|           |        |          |           |                |                     | Imposed $G_0 = 25$ (°C/km)  |                           |              |               |                     | $G_1$ calculated from heat flow measurements |                           |              |               |                     | Heat Flow Measurement Source |
|-----------|--------|----------|-----------|----------------|---------------------|-----------------------------|---------------------------|--------------|---------------|---------------------|----------------------------------------------|---------------------------|--------------|---------------|---------------------|------------------------------|
|           |        |          |           |                |                     | Initial Geothermal Gradient | Final Geothermal Gradient | Erosion Rate | Closure Depth | Closure Temperature | Initial Geothermal Gradient                  | Final Geothermal Gradient | Erosion Rate | Closure Depth | Closure Temperature |                              |
| ID        | Method | Latitude | Longitude | Elevation (km) | Mean Elevation (km) | (°C/km)                     | (°C/km)                   | (km/My)      | (km)          | (°C)                | (°C/km)                                      | (°C/km)                   | (km/My)      | (km)          | (°C)                |                              |
| 020620-3  | AHe    | 44.122   | 10.068    | 0.756          | 0.383               | 25.0                        | 35.1                      | 0.558        | 2.2           | 66.2                | 29.6                                         | 40.0                      | 0.500        | 1.84          | 66.7                | della Vedova et al. (2001)   |
| 03AP08AB  | AHe    | 44.190   | 10.632    | 0.880          | 1.295               | 25.0                        | 32.4                      | 0.426        | 2.3           | 64.0                | 35.8                                         | 42.5                      | 0.282        | 1.56          | 63.5                | della Vedova et al. (2001)   |
| 03AP12A   | AHe    | 44.110   | 10.735    | 0.815          | 1.155               | 25.0                        | 30.6                      | 0.327        | 2.1           | 61.9                | 40.1                                         | 45.0                      | 0.188        | 1.32          | 61.3                | della Vedova et al. (2001)   |
| 03AP23A   | AHe    | 44.129   | 10.429    | 0.425          | 0.709               | 25.1                        | 27.4                      | 0.144        | 1.7           | 53.6                | 19.7                                         | 40.0                      | 0.188        | 2.15          | 52.9                | della Vedova et al. (2001)   |
| 03AP23B   | AHe    | 44.129   | 10.429    | 0.425          | 0.709               | 25.0                        | 29                        | 0.241        | 2.0           | 59.6                | 36.4                                         | 40.0                      | 0.156        | 1.34          | 59.2                | della Vedova et al. (2001)   |
| 03AP28A   | AHe    | 44.111   | 10.529    | 1.035          | 0.899               | 25.0                        | 30.1                      | 0.302        | 2.1           | 61.0                | 34.8                                         | 40.0                      | 0.229        | 1.49          | 61.5                | della Vedova et al. (2001)   |
| 03AP28C   | AHe    | 44.111   | 10.529    | 1.035          | 0.899               | 25.0                        | 29.3                      | 0.262        | 2.0           | 59.8                | 35.5                                         | 40.0                      | 0.194        | 1.43          | 60.3                | della Vedova et al. (2001)   |
| 03AP28D   | AHe    | 44.111   | 10.529    | 1.035          | 0.899               | 25.0                        | 30.5                      | 0.325        | 2.1           | 61.6                | 34.3                                         | 40.0                      | 0.250        | 1.53          | 61.9                | della Vedova et al. (2001)   |
| 03AP29A   | AHe    | 44.130   | 10.542    | 1.320          | 1.050               | 25.0                        | 31.9                      | 0.399        | 2.2           | 63.4                | 32.7                                         | 40.0                      | 0.326        | 1.67          | 63.6                | della Vedova et al. (2001)   |
| 03AP31A   | AHe    | 44.142   | 10.553    | 1.815          | 1.131               | 25.0                        | 31                        | 0.353        | 2.1           | 62.0                | 33.4                                         | 40.0                      | 0.293        | 1.62          | 62.6                | della Vedova et al. (2001)   |
| 03AP31B   | AHe    | 44.142   | 10.553    | 1.815          | 1.131               | 25.1                        | 33.6                      | 0.487        | 2.3           | 64.9                | 33.1                                         | 42.5                      | 0.411        | 1.72          | 65.5                | della Vedova et al. (2001)   |
| 03AP34    | AHe    | 44.066   | 10.107    | 0.285          | 0.340               | 25.1                        | 29.1                      | 0.244        | 1.9           | 59.6                | 36.0                                         | 40.0                      | 0.172        | 1.31          | 59.7                | della Vedova et al. (2001)   |
| 03AP51    | AHe    | 44.014   | 10.380    | 1.060          | 0.688               | 25.0                        | 30.4                      | 0.322        | 2.0           | 61.5                | 34.2                                         | 40.0                      | 0.256        | 1.50          | 62.0                | della Vedova et al. (2001)   |
| 03AP51C   | AHe    | 44.014   | 10.380    | 1.060          | 0.688               | 25.0                        | 29.7                      | 0.279        | 2.0           | 60.1                | 35.0                                         | 40.0                      | 0.218        | 1.43          | 60.9                | della Vedova et al. (2001)   |
| 03AP52A   | AHe    | 44.084   | 10.463    | 0.370          | 0.582               | 25.1                        | 28.7                      | 0.222        | 1.9           | 58.8                | 36.6                                         | 40.0                      | 0.146        | 1.30          | 58.6                | della Vedova et al. (2001)   |
| 03AP52B   | AHe    | 44.084   | 10.463    | 0.370          | 0.582               | 25.0                        | 28.7                      | 0.223        | 1.9           | 58.8                | 36.6                                         | 40.0                      | 0.147        | 1.30          | 58.7                | della Vedova et al. (2001)   |
| 03AP52C   | AHe    | 44.084   | 10.463    | 0.370          | 0.582               | 25.0                        | 28.2                      | 0.194        | 1.9           | 57.7                | 37.1                                         | 40.0                      | 0.125        | 1.25          | 57.5                | della Vedova et al. (2001)   |
| 03GB07    | AHe    | 44.124   | 10.059    | 0.675          | 0.356               | 25.0                        | 32                        | 0.402        | 2.0           | 63.4                | 32.7                                         | 40.0                      | 0.333        | 1.58          | 63.9                | della Vedova et al. (2001)   |
| 03GB09    | AHe    | 44.162   | 10.115    | 0.335          | 0.546               | 25.0                        | 32.5                      | 0.432        | 2.1           | 64.2                | 35.2                                         | 42.5                      | 0.307        | 1.50          | 64.0                | della Vedova et al. (2001)   |
| 03GB10    | AHe    | 44.177   | 10.156    | 0.530          | 0.656               | 25.0                        | 29.4                      | 0.265        | 2.0           | 60.1                | 38.2                                         | 42.5                      | 0.172        | 1.29          | 60.1                | della Vedova et al. (2001)   |
| 03RE02    | AHe    | 44.148   | 10.438    | 0.765          | 0.836               | 25.0                        | 29.3                      | 0.258        | 2.0           | 59.9                | 35.8                                         | 40.0                      | 0.182        | 1.40          | 60.0                | della Vedova et al. (2001)   |
| 03RE05A   | AHe    | 44.188   | 10.480    | 1.495          | 1.138               | 25.1                        | 30.8                      | 0.336        | 2.1           | 61.7                | 34.0                                         | 40.0                      | 0.269        | 1.59          | 62.4                | della Vedova et al. (2001)   |
| 03RE05B   | AHe    | 44.188   | 10.480    | 1.495          | 1.138               | 25.1                        | 31.8                      | 0.392        | 2.2           | 63.2                | 32.8                                         | 40.0                      | 0.322        | 1.68          | 63.6                | della Vedova et al. (2001)   |
| 03RE05C   | AHe    | 44.188   | 10.480    | 1.495          | 0.582               | 25.0                        | 30.7                      | 0.342        | 2.0           | 61.5                | 36.0                                         | 42.5                      | 0.278        | 1.44          | 62.8                | della Vedova et al. (2001)   |
| 03RE05CD  | AHe    | 44.188   | 10.480    | 1.495          | 1.138               | 25.0                        | 29                        | 0.243        | 2.0           | 58.0                | 35.7                                         | 40.0                      | 0.185        | 1.42          | 59.1                | della Vedova et al. (2001)   |
| 03RE05D   | AHe    | 44.188   | 10.480    | 1.495          | 0.582               | 25.0                        | 32.4                      | 0.427        | 2.1           | 63.6                | 34.2                                         | 42.5                      | 0.360        | 1.56          | 64.7                | della Vedova et al. (2001)   |
| 03RE06A   | AHe    | 44.201   | 10.488    | 1.640          | 1.194               | 25.0                        | 31.9                      | 0.395        | 2.2           | 63.0                | 35.1                                         | 42.5                      | 0.313        | 1.59          | 63.8                | della Vedova et al. (2001)   |
| 03RE06B   | AHe    | 44.201   | 10.488    | 1.640          | 1.194               | 25.0                        | 31.3                      | 0.367        | 2.2           | 62.4                | 35.7                                         | 42.5                      | 0.286        | 1.54          | 63.3                | della Vedova et al. (2001)   |
| 03RE12A   | AHe    | 44.059   | 10.767    | 0.460          | 0.942               | 25.0                        | 28.8                      | 0.229        | 2.0           | 59.2                | 42.2                                         | 45.0                      | 0.104        | 1.14          | 57.5                | della Vedova et al. (2001)   |
| 03RE12B   | AHe    | 44.059   | 10.767    | 0.460          | 0.942               | 25.0                        | 29                        | 0.243        | 2.0           | 59.6                | 42.0                                         | 45.0                      | 0.112        | 1.16          | 57.9                | della Vedova et al. (2001)   |
| 03RE14A   | AHe    | 44.005   | 10.665    | 0.840          | 0.635               | 25.0                        | 31.5                      | 0.377        | 2.1           | 62.9                | 33.2                                         | 40.0                      | 0.303        | 1.58          | 63.2                | della Vedova et al. (2001)   |
| 03RE14B   | AHe    | 44.005   | 10.665    | 0.840          | 0.635               | 25.0                        | 27.9                      | 0.184        | 1.6           | 51.7                | 36.7                                         | 40.0                      | 0.139        | 1.18          | 54.3                | della Vedova et al. (2001)   |
| 03RE20    | AHe    | 44.098   | 10.326    | 1.055          | 0.808               | 25.0                        | 32.5                      | 0.432        | 2.2           | 64.1                | 32.1                                         | 40.0                      | 0.358        | 1.69          | 64.3                | della Vedova et al. (2001)   |
| 03RE7     | AHe    | 44.200   | 10.676    | 1.600          | 1.214               | 25.0                        | 38.6                      | 0.727        | 2.4           | 68.7                | 30.7                                         | 45.0                      | 0.639        | 1.99          | 69.1                | della Vedova et al. (2001)   |
| 03RE7R1   | AHe    | 44.200   | 10.676    | 1.600          | 1.214               | 25.0                        | 37.5                      | 0.676        | 2.4           | 68.0                | 31.7                                         | 45.0                      | 0.581        | 1.90          | 68.5                | della Vedova et al. (2001)   |
| 03TH02    | AHe    | 44.086   | 10.568    | 0.979          | 0.881               | 25.0                        | 29.9                      | 0.291        | 2.0           | 60.7                | 37.5                                         | 42.5                      | 0.206        | 1.37          | 61.2                | della Vedova et al. (2001)   |
| 03TH02B   | AHe    | 44.086   | 10.568    | 0.979          | 0.881               | 25.0                        | 29.3                      | 0.261        | 2.0           | 59.8                | 38.1                                         | 42.5                      | 0.181        | 1.33          | 60.3                | della Vedova et al. (2001)   |
| 03TH12B   | AHe    | 44.080   | 10.600    | 0.678          | 0.904               | 25.1                        | 31.4                      | 0.371        | 2.1           | 63.0                | 33.8                                         | 40.0                      | 0.273        | 1.57          | 62.7                | della Vedova et al. (2001)   |
| 03TH13A   | AHe    | 44.013   | 10.593    | 0.153          | 0.578               | 25.0                        | 27.6                      | 0.160        | 1.8           | 56.4                | 16.0                                         | 40.0                      | 0.273        | 2.82          | 56.5                | della Vedova et al. (2001)   |
| 03TH13C   | AHe    | 44.013   | 10.593    | 0.153          | 0.578               | 25.0                        | 28                        | 0.182        | 1.8           | 57.4                | 37.6                                         | 40.0                      | 0.102        | 1.20          | 56.4                | della Vedova et al. (2001)   |
| 03TH18A   | AHe    | 43.980   | 10.552    | 0.047          | 0.449               | 25.1                        | 28.3                      | 0.197        | 1.8           | 58.0                | 37.3                                         | 40.0                      | 0.114        | 1.22          | 57.2                | della Vedova et al. (2001)   |
| 03TH23A   | AHe    | 44.124   | 10.628    | 1.645          | 1.205               | 25.0                        | 33.6                      | 0.485        | 2.3           | 64.9                | 33.3                                         | 42.5                      | 0.400        | 1.72          | 65.4                | della Vedova et al. (2001)   |
| 03TH23BD  | AHe    | 44.124   | 10.628    | 1.645          | 1.205               | 25.1                        | 32.6                      | 0.431        | 2.2           | 63.8                | 34.3                                         | 42.5                      | 0.347        | 1.64          | 64.4                | della Vedova et al. (2001)   |
| 03TH23C   | AHe    | 44.124   | 10.628    | 1.645          | 1.205               | 25.0                        | 33.9                      | 0.502        | 2.3           | 65.1                | 33.0                                         | 42.5                      | 0.418        | 1.75          | 65.8                | della Vedova et al. (2001)   |
| 050320-1C | AHe    | 44.263   | 10.664    | 1.112          | 1.024               | 25.0                        | 51.7                      | 1.255        | 2.6           | 74.7                | 17.8                                         | 42.5                      | 1.533        | 3.68          | 74.4                | della Vedova et al. (2001)   |
| 050320-1D | AHe    | 44.263   | 10.664    | 1.112          | 1.024               | 25.0                        | 42.5                      | 0.896        | 2.5           | 70.8                | 25.0                                         | 42.5                      | 0.896        | 2.48          | 70.8                | della Vedova et al. (2001)   |
| 050320-2B | AHe    | 44.276   | 10.674    | 1.239          | 0.965               | 25.0                        | 31.9                      | 0.401        | 2.2           | 63.3                | 35.2                                         | 42.5                      | 0.311        | 1.55          | 63.9                | della Vedova et al. (2001)   |
| 050320-2C | AHe    | 44.276   | 10.674    | 1.239          | 0.965               | 25.0                        | 31.7                      | 0.392        | 2.2           | 63.1                | 35.4                                         | 42.5                      | 0.302        | 1.54          | 63.8                | della Vedova et al. (2001)   |
| 050320-3A | AHe    | 44.280   | 10.668    | 1.272          | 0.957               | 25.0                        | 28.9                      | 0.237        | 2.0           | 58.2                | 38.3                                         | 42.5                      | 0.171        | 1.30          | 59.3                | della Vedova et al. (2001)   |
| 050320-3B | AHe    | 44.280   | 10.668    | 1.272          | 0.957               | 25.0                        | 31.2                      | 0.360        | 2.1           | 62.3                | 35.9                                         | 42.5                      | 0.276        | 1.50          | 63.0                | della Vedova et al. (2001)   |
| 050320-3C | AHe    | 44.280   | 10.668    | 1.272          | 0.957               | 25.0                        | 30.6                      | 0.331        | 2.1           | 61.6                | 36.5                                         | 42.5                      | 0.249        | 1.45          | 62.4                | della Vedova et al. (2001)   |
| 1926      | AHe    | 44.107   | 11.729    | 0.250          | 0.471               | 25.1                        | 29.2                      | 0.249        | 1.9           | 59.8                | 21.3                                         | 25.5                      | 0.295        | 2.26          | 59.9                | Pauselli et al. (2019)       |
| 1926B     | AHe    | 44.107   | 11.729    | 0.250          | 0.471               | 25.0                        | 33.2                      | 0.467        | 2.1           | 64.8                | 17.2                                         | 25.5                      | 0.650        | 3.08          | 64.9                | Pauselli et al. (2019)       |
| 1926C     | AHe    | 44.107   | 11.729    | 0.250          | 0.471               | 25.0                        | 29.4                      | 0.260        | 1.9           | 60.1                | 21.1                                         | 25.5                      | 0.311        | 2.30          | 60.1                | Pauselli et al. (2019)       |
| 1926D     | AHe    | 44.107   | 11.729    | 0.250          | 0.471               | 25.0                        | 34                        | 0.504        | 2.1           | 65.6                | 16.5                                         | 25.5                      | 0.723        | 3.25          | 65.6                | Pauselli et al. (2019)       |
| 1929      | AHe    | 44.037   | 11.504    | 0.700          | 0.702               | 25.0                        | 42.9                      | 0.910        | 2.4           | 71.1                | 12.6                                         | 28.5                      | 1.431        | 4.78          | 70.7                | Pauselli et al. (2019)       |
| AP1       | AHe    | 43.790   | 12.146    | 0.700          | 0.776               | 25.0                        | 45.7                      | 1.022        | 2.5           | 72.3                | 15.1                                         | 23.5                      | 1.431        | 4.12          | 72.3                | Pauselli et al. (2019)       |
| AP17      | AHe    | 43.876   | 12.110    | 0.600          | 0.605               | 25.0                        | 40.2                      | 0.800        | 2.4           | 69.8                | 9.4                                          | 22.5                      | 1.539        | 6.17          | 69.1                | Pauselli et al. (2019)       |
| AP2       | AHe    | 43.789   | 12.151    | 0.600          | 0.771               | 25.0                        | 36.4                      | 0.622        | 2.3           | 67.4                | 13.1                                         | 24.0                      | 1.033        | 4.36          | 67.4                | Pauselli et al. (2019)       |
| AP3       | AHe    | 43.815   | 12.149    | 0.900          | 0.727               | 25.0                        | 35.4                      | 0.575        | 2.2           | 66.5                | 14.1                                         | 23.5                      | 0.867        | 3.95          | 65.9                | Pauselli et al. (2019)       |
| AP30      | AHe    | 43.895   | 11.779    | 0.750          | 0.879               | 25.0                        | 42                        | 0.873        | 2.4           | 70.7                | 12.0                                         | 27.5                      | 1.454        | 5.07          | 70.6                | Pauselli et al. (2019)       |
| AP33      | AHe    | 43.919   | 11.792    | 0.650          | 0.801               | 25.0                        | 45.3                      | 1.011        | 2.5           | 72.3                | 9.3                                          | 27.0                      | 1.921        | 6.64          | 72.1                | Pauselli et al. (2019)       |
| AP36E     | AHe    | 44.097   | 11.955    | 0.370          | 0.271               | 25.0                        | 28.1                      | 0.189        | 1.7           | 56.3                | 19.4                                         | 22.5                      | 0.236        | 2.20          | 55.6                | Pauselli et al. (2019)       |
| AP37      | AHe    | 44.015   | 11.951    | 0.150          | 0.423               | 25.0                        | 33.4                      | 0.478        | 2.1           | 65.1                | 12.5                                         | 21.0                      | 0.870        | 4.24          | 65.2                | Pauselli et al. (2019)       |
| AP38      | AHe    | 43.797   | 11.914    | 1.200          | 0.858               | 25.0                        | 43.6                      | 0.947        | 2.5           | 71.5                | 10.9                                         | 26.0                      | 1.533        | 5.55          | 70.2                | Pauselli et al. (2019)       |
| AP43R1    | AHe    | 43.818   | 11.733    | 0.515          | 0.860               | 25.1                        | 33.1                      | 0.458        | 2.2           | 64.8                | 21.3                                         | 29.5                      | 0.537        | 2.58          | 64.8                | Pauselli et al. (2019)       |
| AP43R2    | AHe    | 43.818   | 11.733    | 0.515          | 0.860               | 25.1                        | 32.5                      | 0.425        | 2.2           | 64.1                | 22.0                                         | 29.5                      | 0.485        | 2.48          | 64.3                | Pauselli et al. (2019)       |
| AP44R1    | AHe    | 43.824   | 11.746    | 0.725          | 0.868               | 25.0                        | 38.7                      | 0.735        | 2.4           | 69.1                | 16.2                                         | 29.5                      | 1.017        | 3.64          | 68.9                | Pauselli et al. (2019)       |
| AP45R1    | AHe    | 43.844   | 11.749    | 0.940          | 0.897               | 25.0                        | 35.3                      | 0.568        | 2.3           | 66.5                | 19.5                                         | 29.5                      | 0.687        | 2.90          | 66.3                | Pauselli et al. (2019)       |
| AP45R2    | AHe    | 43.844   | 11.749    | 0.940          | 0.897               | 25.0                        | 53.1                      |              |               |                     |                                              |                           |              |               |                     |                              |

|         |     |        |        |       |       |      |      |       |     |      |      |      |       |      |      |                            |
|---------|-----|--------|--------|-------|-------|------|------|-------|-----|------|------|------|-------|------|------|----------------------------|
| AP47R1  | AHe | 43.864 | 11.739 | 1.365 | 0.906 | 25.0 | 42   | 0.873 | 2.4 | 70.6 | 14.5 | 29.0 | 1.200 | 4.15 | 69.7 | Pauselli et al. (2019)     |
| AP48R1  | AHe | 43.879 | 11.711 | 1.655 | 0.907 | 25.0 | 38.8 | 0.736 | 2.4 | 68.9 | 17.7 | 30.0 | 0.893 | 3.30 | 67.9 | Pauselli et al. (2019)     |
| AP48R2  | AHe | 43.879 | 11.711 | 1.655 | 0.907 | 25.0 | 38.8 | 0.736 | 2.4 | 68.9 | 17.7 | 30.0 | 0.893 | 3.30 | 67.9 | Pauselli et al. (2019)     |
| AP5     | AHe | 44.189 | 11.501 | 0.200 | 0.521 | 25.0 | 29   | 0.241 | 1.9 | 59.6 | 24.5 | 28.5 | 0.247 | 1.96 | 59.6 | della Vedova et al. (2001) |
| AP52    | AHe | 43.905 | 11.791 | 0.565 | 0.836 | 25.1 | 38.2 | 0.706 | 2.3 | 68.7 | 13.7 | 26.5 | 1.141 | 4.32 | 68.9 | Pauselli et al. (2019)     |
| AP53    | AHe | 43.934 | 11.656 | 0.907 | 0.830 | 25.0 | 31.1 | 0.356 | 2.1 | 62.5 | 23.0 | 29.0 | 0.383 | 2.28 | 62.4 | Pauselli et al. (2019)     |
| AP54    | AHe | 43.961 | 11.670 | 0.690 | 0.811 | 25.0 | 39.5 | 0.765 | 2.4 | 69.4 | 13.9 | 27.5 | 1.176 | 4.26 | 69.1 | Pauselli et al. (2019)     |
| AP55    | AHe | 44.013 | 11.687 | 1.070 | 0.722 | 25.0 | 42.7 | 0.901 | 2.4 | 70.9 | 12.7 | 27.5 | 1.347 | 4.69 | 69.9 | Pauselli et al. (2019)     |
| AP57    | AHe | 43.995 | 11.719 | 0.450 | 0.746 | 25.0 | 42.9 | 0.910 | 2.4 | 71.2 | 10.8 | 27.5 | 1.669 | 5.68 | 71.5 | Pauselli et al. (2019)     |
| AP5B    | AHe | 44.189 | 11.501 | 0.200 | 0.521 | 25.0 | 36.1 | 0.610 | 2.2 | 67.3 | 17.3 | 28.5 | 0.841 | 3.24 | 67.6 | della Vedova et al. (2001) |
| AP5C    | AHe | 44.189 | 11.501 | 0.200 | 0.521 | 25.0 | 46.5 | 1.057 | 2.4 | 72.8 | 32.9 | 28.5 | 0.841 | 1.86 | 72.6 | della Vedova et al. (2001) |
| AP5D    | AHe | 44.189 | 11.501 | 0.200 | 0.521 | 25.0 | 33.9 | 0.501 | 2.2 | 65.5 | 19.5 | 28.5 | 0.634 | 2.78 | 65.7 | della Vedova et al. (2001) |
| AP8     | AHe | 44.147 | 11.449 | 0.300 | 0.629 | 25.1 | 42.7 | 0.903 | 2.4 | 71.2 | 12.9 | 30.0 | 1.483 | 4.69 | 71.4 | della Vedova et al. (2001) |
| AP9     | AHe | 44.115 | 11.431 | 0.400 | 0.674 | 25.0 | 42.5 | 0.893 | 2.4 | 71.0 | 11.1 | 27.5 | 1.601 | 5.43 | 71.3 | Pauselli et al. (2019)     |
| C1      | AHe | 44.113 | 11.002 | 0.500 | 0.765 | 25.0 | 32.2 | 0.415 | 2.1 | 63.9 | 33.0 | 40.0 | 0.312 | 1.62 | 63.6 | della Vedova et al. (2001) |
| C10     | AHe | 44.143 | 11.191 | 0.605 | 0.766 | 25.0 | 55.2 | 1.386 | 2.6 | 76.0 | NA   | 35.0 | 0.312 | 0.49 | 73.3 | della Vedova et al. (2001) |
| C11     | AHe | 44.001 | 10.807 | 0.950 | 0.667 | 25.1 | 30.9 | 0.342 | 2.0 | 62.0 | 38.7 | 45.0 | 0.247 | 1.34 | 62.8 | della Vedova et al. (2001) |
| C13     | AHe | 44.021 | 10.864 | 0.700 | 0.747 | 25.0 | 32.8 | 0.443 | 2.2 | 64.3 | 39.7 | 47.5 | 0.295 | 1.37 | 64.6 | della Vedova et al. (2001) |
| C16     | AHe | 44.060 | 10.913 | 0.630 | 0.909 | 25.0 | 34.1 | 0.513 | 2.2 | 65.6 | 36.2 | 45.0 | 0.353 | 1.54 | 65.3 | della Vedova et al. (2001) |
| C17     | AHe | 44.068 | 10.919 | 0.625 | 0.921 | 25.0 | 34.2 | 0.517 | 2.3 | 65.8 | 36.2 | 45.0 | 0.355 | 1.54 | 65.3 | della Vedova et al. (2001) |
| C2      | AHe | 44.004 | 11.012 | 0.830 | 0.660 | 25.0 | 34.4 | 0.522 | 2.2 | 65.7 | 35.1 | 45.0 | 0.406 | 1.57 | 66.1 | della Vedova et al. (2001) |
| C22     | AHe | 44.041 | 10.932 | 0.850 | 0.821 | 25.1 | 33   | 0.454 | 2.2 | 64.6 | 36.8 | 45.0 | 0.330 | 1.49 | 64.8 | della Vedova et al. (2001) |
| C23     | AHe | 44.021 | 10.929 | 0.884 | 0.719 | 25.0 | 32.9 | 0.453 | 2.2 | 64.6 | 36.7 | 45.0 | 0.338 | 1.49 | 65.0 | della Vedova et al. (2001) |
| C29     | AHe | 44.731 | 9.386  | 0.320 | 0.775 | 25.0 | 32.9 | 0.454 | 2.2 | 64.7 | 27.2 | 35.0 | 0.412 | 2.00 | 64.5 | della Vedova et al. (2001) |
| C3      | AHe | 44.014 | 11.025 | 0.780 | 0.706 | 25.0 | 33   | 0.452 | 2.2 | 64.4 | 36.7 | 45.0 | 0.331 | 1.48 | 64.8 | della Vedova et al. (2001) |
| C34     | AHe | 44.417 | 9.949  | 0.510 | 0.855 | 25.1 | 34.1 | 0.508 | 2.2 | 65.7 | 31.2 | 40.0 | 0.405 | 1.78 | 65.3 | della Vedova et al. (2001) |
| C37     | AHe | 44.246 | 10.683 | 0.641 | 1.064 | 25.0 | 39.3 | 0.755 | 2.4 | 69.3 | 31.2 | 45.0 | 0.610 | 1.93 | 69.0 | della Vedova et al. (2001) |
| C4      | AHe | 44.028 | 11.038 | 0.680 | 0.753 | 25.1 | 39.7 | 0.772 | 2.4 | 69.5 | 28.7 | 43.5 | 0.696 | 2.06 | 69.6 | della Vedova et al. (2001) |
| C40     | AHe | 44.223 | 10.758 | 1.250 | 0.980 | 25.1 | 45.5 | 1.017 | 2.5 | 72.3 | 25.4 | 46.0 | 1.007 | 2.48 | 72.2 | della Vedova et al. (2001) |
| C5      | AHe | 44.049 | 11.044 | 0.610 | 0.798 | 25.0 | 32.6 | 0.434 | 2.2 | 64.2 | 35.0 | 42.5 | 0.313 | 1.54 | 64.0 | della Vedova et al. (2001) |
| C52A    | AHe | 44.013 | 11.503 | 0.360 | 0.661 | 25.1 | 32.4 | 0.419 | 2.1 | 63.9 | 21.1 | 28.5 | 0.497 | 2.53 | 64.1 | Pauselli et al. (2019)     |
| C6      | AHe | 44.095 | 11.044 | 0.650 | 0.779 | 25.0 | 39.5 | 0.762 | 2.4 | 69.3 | 25.5 | 40.0 | 0.751 | 2.32 | 69.3 | della Vedova et al. (2001) |
| C7      | AHe | 44.111 | 11.039 | 0.625 | 0.755 | 25.0 | 38.5 | 0.725 | 2.3 | 68.9 | 26.4 | 40.0 | 0.693 | 2.22 | 68.8 | della Vedova et al. (2001) |
| C8      | AHe | 44.115 | 11.204 | 0.700 | 0.757 | 25.0 | 40.3 | 0.802 | 2.4 | 69.8 | 22.4 | 37.5 | 0.870 | 2.66 | 69.8 | della Vedova et al. (2001) |
| C9      | AHe | 44.106 | 11.204 | 1.000 | 0.738 | 25.0 | 46.3 | 1.051 | 2.5 | 72.7 | 18.0 | 37.5 | 1.275 | 3.44 | 72.4 | della Vedova et al. (2001) |
| CIM1    | AHe | 44.194 | 10.699 | 2.165 | 1.174 | 25.0 | 40.2 | 0.800 | 2.5 | 69.5 | 28.9 | 45.0 | 0.745 | 2.14 | 70.0 | della Vedova et al. (2001) |
| CIM1R1  | AHe | 44.194 | 10.699 | 2.165 | 1.174 | 25.0 | 40.2 | 0.802 | 2.5 | 69.5 | 28.9 | 45.0 | 0.748 | 2.14 | 70.1 | della Vedova et al. (2001) |
| CIM2    | AHe | 44.194 | 10.704 | 2.045 | 1.165 | 25.1 | 42.8 | 0.908 | 2.5 | 71.0 | 26.8 | 45.0 | 0.879 | 2.35 | 71.2 | della Vedova et al. (2001) |
| CIM3    | AHe | 44.196 | 10.692 | 1.950 | 1.184 | 25.1 | 42.7 | 0.903 | 2.5 | 70.9 | 26.9 | 45.0 | 0.871 | 2.34 | 71.1 | della Vedova et al. (2001) |
| CIM3R1  | AHe | 44.196 | 10.692 | 1.950 | 1.184 | 25.0 | 38.1 | 0.705 | 2.4 | 68.3 | 30.8 | 45.0 | 0.629 | 1.97 | 68.7 | della Vedova et al. (2001) |
| CIM4    | AHe | 44.200 | 10.684 | 1.830 | 1.196 | 25.0 | 40.4 | 0.810 | 2.5 | 69.8 | 28.8 | 45.0 | 0.749 | 2.15 | 70.0 | della Vedova et al. (2001) |
| CIM4R1  | AHe | 44.200 | 10.684 | 1.830 | 1.196 | 25.0 | 39.7 | 0.779 | 2.5 | 69.3 | 29.5 | 45.0 | 0.710 | 2.09 | 69.8 | della Vedova et al. (2001) |
| CIM5    | AHe | 44.202 | 10.677 | 1.750 | 1.208 | 25.0 | 39.2 | 0.751 | 2.4 | 69.0 | 30.0 | 45.0 | 0.675 | 2.04 | 69.2 | della Vedova et al. (2001) |
| CIM5A   | AHe | 44.202 | 10.677 | 1.750 | 1.208 | 25.0 | 40.6 | 0.818 | 2.5 | 70.0 | 28.7 | 45.0 | 0.756 | 2.16 | 70.1 | della Vedova et al. (2001) |
| CIM5R1  | AHe | 44.202 | 10.677 | 1.750 | 1.208 | 25.1 | 41.7 | 0.857 | 2.5 | 70.4 | 27.9 | 45.0 | 0.808 | 2.25 | 70.7 | della Vedova et al. (2001) |
| CIM6    | AHe | 44.201 | 10.666 | 1.660 | 1.230 | 25.0 | 40.2 | 0.800 | 2.5 | 69.7 | 29.2 | 45.0 | 0.730 | 2.13 | 70.0 | della Vedova et al. (2001) |
| CIM6R1  | AHe | 44.201 | 10.666 | 1.660 | 1.230 | 25.0 | 39.9 | 0.785 | 2.5 | 69.4 | 29.4 | 45.0 | 0.712 | 2.10 | 69.8 | della Vedova et al. (2001) |
| VALD10a | AHe | 43.653 | 11.640 | 1.400 | 0.836 | 25.0 | 36.9 | 0.651 | 2.3 | 67.7 | 17.7 | 28.5 | 0.804 | 3.22 | 67.1 | Pauselli et al. (2019)     |
| VALD1a  | AHe | 43.594 | 11.603 | 0.497 | 0.471 | 25.0 | 29.3 | 0.259 | 1.9 | 59.9 | 24.7 | 29.0 | 0.262 | 1.95 | 59.9 | Pauselli et al. (2019)     |
| VALD2a  | AHe | 43.612 | 11.645 | 0.500 | 0.685 | 25.0 | 32   | 0.405 | 2.1 | 63.7 | 23.0 | 30.0 | 0.438 | 2.31 | 63.7 | Pauselli et al. (2019)     |
| VALD2R1 | AHe | 43.612 | 11.645 | 0.500 | 0.685 | 25.0 | 32   | 0.408 | 2.1 | 63.7 | 23.0 | 30.0 | 0.441 | 2.31 | 63.8 | Pauselli et al. (2019)     |
| VALD4a1 | AHe | 43.620 | 11.648 | 0.740 | 0.730 | 25.0 | 33.8 | 0.497 | 2.2 | 65.4 | 20.8 | 29.5 | 0.575 | 2.63 | 65.2 | Pauselli et al. (2019)     |
| VALD4a2 | AHe | 43.620 | 11.648 | 0.740 | 0.730 | 25.0 | 31.2 | 0.359 | 2.1 | 62.5 | 23.3 | 29.5 | 0.381 | 2.23 | 62.4 | Pauselli et al. (2019)     |
| VALD4R1 | AHe | 43.620 | 11.648 | 0.740 | 0.730 | 25.1 | 32.8 | 0.442 | 2.1 | 64.3 | 21.8 | 29.5 | 0.495 | 2.46 | 64.2 | Pauselli et al. (2019)     |
| VALD5a  | AHe | 43.621 | 11.656 | 0.850 | 0.747 | 25.0 | 33.3 | 0.470 | 2.2 | 64.8 | 21.9 | 30.0 | 0.523 | 2.48 | 64.7 | Pauselli et al. (2019)     |
| VALD5R1 | AHe | 43.621 | 11.656 | 0.850 | 0.747 | 25.0 | 33.4 | 0.474 | 2.2 | 64.8 | 21.8 | 30.0 | 0.529 | 2.50 | 64.7 | Pauselli et al. (2019)     |
| VALD6a  | AHe | 43.620 | 11.659 | 0.880 | 0.746 | 25.0 | 33.1 | 0.465 | 2.2 | 64.7 | 22.0 | 30.0 | 0.513 | 2.46 | 64.5 | Pauselli et al. (2019)     |
| VALD6R1 | AHe | 43.620 | 11.659 | 0.880 | 0.746 | 25.0 | 33.6 | 0.490 | 2.2 | 65.2 | 21.5 | 30.0 | 0.548 | 2.54 | 64.9 | Pauselli et al. (2019)     |
| VALD7a  | AHe | 43.604 | 11.651 | 1.100 | 0.658 | 25.0 | 35.3 | 0.575 | 2.2 | 66.5 | 21.0 | 31.0 | 0.642 | 2.63 | 66.1 | Pauselli et al. (2019)     |
| VALD8R1 | AHe | 43.626 | 11.684 | 1.200 | 0.782 | 25.0 | 34.5 | 0.528 | 2.2 | 65.6 | 21.4 | 30.5 | 0.587 | 2.58 | 65.4 | Pauselli et al. (2019)     |
| VALD8R2 | AHe | 43.626 | 11.684 | 1.200 | 0.782 | 25.0 | 36.2 | 0.615 | 2.3 | 67.1 | 19.9 | 30.5 | 0.712 | 2.84 | 66.8 | Pauselli et al. (2019)     |

**Kinetic Parameters for (U-Th)/He apatite (from Farley, 2000 and Reiners and Brandon, 2006)**

$E_a = 138 \text{ kJ mol}^{-1}$  (activation energy)

$a_s = 45 \text{ } \mu\text{m}$  (effective spherical radius for the diffusion domain)

$\Omega = 1.36 \times 10^6$  (frequency factor calculated as  $55D_0a^{-2}$ )

$t_{c,10} = 62.7^\circ\text{C}$  (effective closure temperature for  $10 \text{ Myr}^{-1}$  cooling rates and specified  $a_s$  value)

**Supplementary Table 6 Erosion rates and parameters for AFT bedrock samples.**

|           |        |          |           |                       |                     | Imposed $G_0 = 25$ (°C/km) |                              |                      |                    |                          | $G_1$ calculated from heat flow measurements |                              |                      |                    |                          |                              |
|-----------|--------|----------|-----------|-----------------------|---------------------|----------------------------|------------------------------|----------------------|--------------------|--------------------------|----------------------------------------------|------------------------------|----------------------|--------------------|--------------------------|------------------------------|
| ID        | Method | Latitude | Longitude | Sample Elevation (km) | Mean Elevation (km) | Geother                    | Final                        | Erosion Rate (km/My) | Closure Depth (km) | Closure Temperature (°C) | Geother                                      | Final                        | Erosion Rate (km/My) | Closure Depth (km) | Closure Temperature (°C) | Heat Flow Measurement Source |
|           |        |          |           |                       |                     | mal Gradient (°C/km)       | Geother mal Gradient (°C/km) |                      |                    |                          | Geother mal Gradient (°C/km)                 | Geother mal Gradient (°C/km) |                      |                    |                          |                              |
| 1927      | AFT    | 44.064   | 11.597    | 0.350                 | 0.667               | 25.1                       | 32.2                         | 0.410                | 4.1                | 113.9                    | 20.8                                         | 28.0                         | 0.494                | 4.9                | 113.4                    | Pauselli et al. (2019)       |
| 1929      | AFT    | 44.037   | 11.504    | 0.700                 | 0.619               | 25.0                       | 35.3                         | 0.574                | 4.3                | 118.8                    | 18.3                                         | 28.5                         | 0.743                | 5.8                | 117.9                    | Pauselli et al. (2019)       |
| 1930      | AFT    | 44.069   | 11.492    | 1.150                 | 0.630               | 25.0                       | 40.4                         | 0.805                | 4.5                | 123.2                    | 14.8                                         | 29.0                         | 1.155                | 7.5                | 121.8                    | Pauselli et al. (2019)       |
| 03GB07    | AFT    | 44.124   | 10.059    | 0.675                 | 0.356               | 25.0                       | 34.1                         | 0.508                | 4.2                | 116.3                    | 30.8                                         | 40.0                         | 0.429                | 3.4                | 117.2                    | della Vedova et al. (2001)   |
| 03RE20    | AFT    | 44.098   | 10.326    | 1.055                 | 0.760               | 25.0                       | 34.6                         | 0.536                | 4.3                | 117.1                    | 30.2                                         | 40.0                         | 0.459                | 3.6                | 117.7                    | della Vedova et al. (2001)   |
| 050320-1a | AFT    | 44.263   | 10.664    | 1.112                 | 0.976               | 25.0                       | 34.5                         | 0.532                | 4.3                | 117.4                    | 32.9                                         | 42.5                         | 0.422                | 3.3                | 118.1                    | della Vedova et al. (2001)   |
| 050320-1b | AFT    | 44.263   | 10.664    | 1.112                 | 0.976               | 25.0                       | 38.3                         | 0.712                | 4.5                | 121.7                    | 29.1                                         | 42.5                         | 0.634                | 3.9                | 122.0                    | della Vedova et al. (2001)   |
| AP 10     | AFT    | 44.121   | 11.396    | 0.500                 | 0.685               | 25.0                       | 39.8                         | 0.780                | 4.5                | 123.2                    | 13.2                                         | 27.5                         | 1.277                | 8.5                | 121.9                    | Pauselli et al. (2019)       |
| AP 15     | AFT    | 43.819   | 11.952    | 0.700                 | 0.805               | 25.0                       | 32.1                         | 0.411                | 4.1                | 112.4                    | 22.9                                         | 30.0                         | 0.446                | 4.4                | 111.8                    | Pauselli et al. (2019)       |
| AP 34     | AFT    | 44.097   | 11.315    | 0.600                 | 0.653               | 25.0                       | 35.7                         | 0.592                | 4.3                | 119.3                    | 17.4                                         | 28.0                         | 0.802                | 6.2                | 118.3                    | Pauselli et al. (2019)       |
| AP 43     | AFT    | 43.818   | 11.733    | 0.515                 | 0.805               | 25.0                       | 36                           | 0.608                | 4.4                | 119.9                    | 18.4                                         | 29.5                         | 0.793                | 5.9                | 119.2                    | Pauselli et al. (2019)       |
| AP 44     | AFT    | 43.824   | 11.746    | 0.725                 | 0.807               | 25.0                       | 38.6                         | 0.725                | 4.5                | 122.0                    | 16.7                                         | 30.0                         | 0.996                | 6.7                | 121.3                    | Pauselli et al. (2019)       |
| AP 45     | AFT    | 43.828   | 11.749    | 0.940                 | 0.809               | 25.0                       | 38.9                         | 0.741                | 4.5                | 122.3                    | 16.1                                         | 29.5                         | 1.031                | 6.9                | 121.0                    | Pauselli et al. (2019)       |
| AP 47     | AFT    | 43.864   | 11.739    | 1.365                 | 0.816               | 25.0                       | 40.6                         | 0.816                | 4.5                | 123.1                    | 14.6                                         | 29.0                         | 1.176                | 7.6                | 121.4                    | Pauselli et al. (2019)       |
| AP 52     | AFT    | 43.905   | 11.723    | 0.565                 | 0.799               | 25.1                       | 36.7                         | 0.633                | 4.4                | 120.1                    | 18.4                                         | 30.0                         | 0.824                | 6.0                | 119.7                    | Pauselli et al. (2019)       |
| AP 53     | AFT    | 43.934   | 11.656    | 0.907                 | 0.814               | 25.0                       | 33.1                         | 0.458                | 4.2                | 114.5                    | 21.0                                         | 29.0                         | 0.536                | 4.9                | 113.9                    | Pauselli et al. (2019)       |
| AP 54     | AFT    | 43.961   | 11.670    | 0.690                 | 0.747               | 25.0                       | 36.3                         | 0.617                | 4.4                | 119.8                    | 17.4                                         | 28.5                         | 0.835                | 6.3                | 119.1                    | Pauselli et al. (2019)       |
| AP 55     | AFT    | 44.013   | 11.687    | 1.070                 | 0.672               | 25.0                       | 34.4                         | 0.525                | 4.2                | 116.6                    | 19.3                                         | 28.5                         | 0.648                | 5.4                | 115.5                    | Pauselli et al. (2019)       |
| AP 56     | AFT    | 43.983   | 11.686    | 0.500                 | 0.723               | 25.0                       | 39                           | 0.747                | 4.5                | 122.4                    | 14.7                                         | 28.5                         | 1.134                | 7.6                | 121.8                    | Pauselli et al. (2019)       |
| AP 57     | AFT    | 43.995   | 11.719    | 0.450                 | 0.688               | 25.0                       | 40.6                         | 0.814                | 4.5                | 123.5                    | 12.4                                         | 27.5                         | 1.384                | 9.0                | 122.5                    | Pauselli et al. (2019)       |
| AP 9      | AFT    | 44.115   | 11.431    | 0.400                 | 0.673               | 25.0                       | 39.4                         | 0.761                | 4.5                | 122.8                    | 13.9                                         | 28.0                         | 1.211                | 8.0                | 122.0                    | Pauselli et al. (2019)       |
| BOR2      | AFT    | 44.435   | 9.425     | 0.452                 | 0.779               | 25.0                       | 33                           | 0.457                | 4.2                | 115.9                    | 32.2                                         | 40.0                         | 0.355                | 3.3                | 116.2                    | della Vedova et al. (2001)   |
| BORI      | AFT    | 44.435   | 9.425     | 0.450                 | 0.779               | 25.0                       | 34.2                         | 0.519                | 4.3                | 117.8                    | 30.9                                         | 40.0                         | 0.422                | 3.5                | 117.8                    | della Vedova et al. (2001)   |
| BT1       | AFT    | 44.085   | 9.787     | 0.475                 | 0.104               | 25.0                       | 39.8                         | 0.780                | 4.4                | 123.0                    | 25.2                                         | 40.0                         | 0.775                | 4.3                | 122.6                    | della Vedova et al. (2001)   |
| BT2       | AFT    | 44.085   | 9.787     | 0.525                 | 0.104               | 25.0                       | 39.6                         | 0.770                | 4.4                | 122.6                    | 25.4                                         | 40.0                         | 0.762                | 4.3                | 122.5                    | della Vedova et al. (2001)   |
| C1        | AFT    | 44.113   | 11.002    | 0.500                 | 0.789               | 25.0                       | 34                           | 0.505                | 4.3                | 117.1                    | 33.7                                         | 42.5                         | 0.379                | 3.2                | 117.5                    | della Vedova et al. (2001)   |
| C10       | AFT    | 44.143   | 11.191    | 0.605                 | 0.683               | 25.0                       | 40.3                         | 0.802                | 4.5                | 123.3                    | 19.9                                         | 35.0                         | 0.954                | 5.6                | 122.9                    | della Vedova et al. (2001)   |
| C11       | AFT    | 44.001   | 10.807    | 0.950                 | 0.644               | 25.1                       | 32.2                         | 0.414                | 3.8                | 106.7                    | 37.4                                         | 45.0                         | 0.299                | 2.7                | 110.7                    | della Vedova et al. (2001)   |
| C13       | AFT    | 44.021   | 10.864    | 0.700                 | 0.731               | 25.0                       | 34.6                         | 0.533                | 4.3                | 117.6                    | 38.0                                         | 47.5                         | 0.369                | 2.8                | 118.6                    | della Vedova et al. (2001)   |
| C16       | AFT    | 44.060   | 10.913    | 0.630                 | 0.807               | 25.0                       | 45.3                         | 1.014                | 4.7                | 126.6                    | 24.7                                         | 45.0                         | 1.022                | 4.7                | 126.5                    | della Vedova et al. (2001)   |
| C17       | AFT    | 44.068   | 10.919    | 0.625                 | 0.818               | 25.0                       | 37.2                         | 0.661                | 4.4                | 121.0                    | 32.9                                         | 45.0                         | 0.522                | 3.4                | 121.2                    | della Vedova et al. (2001)   |
| C2        | AFT    | 44.004   | 11.012    | 0.830                 | 0.548               | 25.0                       | 35.8                         | 0.593                | 4.3                | 118.9                    | 33.9                                         | 45.0                         | 0.466                | 3.2                | 119.5                    | della Vedova et al. (2001)   |
| C22       | AFT    | 44.041   | 10.932    | 0.850                 | 0.747               | 25.0                       | 45.3                         | 1.012                | 4.6                | 126.7                    | 24.7                                         | 45.0                         | 1.020                | 4.7                | 126.4                    | della Vedova et al. (2001)   |
| C23       | AFT    | 44.021   | 10.929    | 0.884                 | 0.689               | 25.1                       | 38                           | 0.692                | 4.4                | 121.0                    | 32.7                                         | 46.0                         | 0.563                | 3.4                | 121.6                    | della Vedova et al. (2001)   |
| C29       | AFT    | 44.731   | 9.386     | 0.320                 | 0.804               | 25.0                       | 36.5                         | 0.630                | 4.4                | 120.4                    | 23.4                                         | 35.0                         | 0.668                | 4.7                | 120.2                    | della Vedova et al. (2001)   |
| C3        | AFT    | 44.014   | 11.025    | 0.780                 | 0.580               | 25.1                       | 38.4                         | 0.711                | 4.4                | 121.4                    | 30.0                                         | 43.5                         | 0.621                | 3.7                | 122.2                    | della Vedova et al. (2001)   |
| C34       | AFT    | 44.417   | 9.949     | 0.510                 | 0.820               | 25.1                       | 32.2                         | 0.410                | 4.1                | 113.8                    | 33.1                                         | 40.0                         | 0.309                | 3.2                | 114.4                    | della Vedova et al. (2001)   |
| C37       | AFT    | 44.246   | 10.683    | 0.641                 | 1.016               | 25.0                       | 44.8                         | 0.991                | 4.7                | 126.6                    | 23.7                                         | 43.5                         | 1.032                | 4.9                | 126.3                    | della Vedova et al. (2001)   |
| C38       | AFT    | 44.223   | 10.777    | 0.980                 | 0.950               | 25.0                       | 44.5                         | 0.977                | 4.7                | 125.9                    | 26.0                                         | 45.5                         | 0.952                | 4.5                | 126.2                    | della Vedova et al. (2001)   |
| C4        | AFT    | 44.028   | 11.038    | 0.680                 | 0.620               | 25.0                       | 43.4                         | 0.933                | 4.6                | 125.5                    | 25.1                                         | 43.5                         | 0.930                | 4.6                | 125.5                    | della Vedova et al. (2001)   |
| C40       | AFT    | 44.223   | 10.758    | 1.250                 | 0.977               | 25.0                       | 41.5                         | 0.851                | 4.6                | 123.8                    | 29.2                                         | 46.0                         | 0.763                | 3.9                | 124.4                    | della Vedova et al. (2001)   |
| C5        | AFT    | 44.049   | 11.044    | 0.610                 | 0.679               | 25.0                       | 36                           | 0.606                | 4.4                | 119.6                    | 32.4                                         | 43.5                         | 0.484                | 3.4                | 120.0                    | della Vedova et al. (2001)   |
| C52       | AFT    | 44.013   | 11.503    | 0.360                 | 0.594               | 25.0                       | 35.1                         | 0.562                | 4.3                | 118.8                    | 18.4                                         | 28.5                         | 0.739                | 5.8                | 118.3                    | Pauselli et al. (2019)       |
| C6        | AFT    | 44.095   | 11.044    | 0.650                 | 0.735               | 25.0                       | 37.3                         | 0.669                | 4.4                | 120.9                    | 27.6                                         | 40.0                         | 0.614                | 4.0                | 121.0                    | della Vedova et al. (2001)   |
| C7        | AFT    | 44.111   | 11.039    | 0.625                 | 0.738               | 25.0                       | 36.4                         | 0.626                | 4.4                | 120.1                    | 28.5                                         | 40.0                         | 0.558                | 3.8                | 120.2                    | della Vedova et al. (2001)   |
| C8        | AFT    | 44.115   | 11.207    | 0.700                 | 0.680               | 25.0                       | 35.5                         | 0.580                | 4.3                | 118.8                    | 27.0                                         | 37.5                         | 0.544                | 4.0                | 119.1                    | della Vedova et al. (2001)   |
| C9        | AFT    | 44.106   | 11.204    | 1.000                 | 0.673               | 27.0                       | 36.8                         | 0.512                | 4.0                | 117.7                    | 27.7                                         | 37.5                         | 0.502                | 3.9                | 117.9                    | della Vedova et al. (2001)   |
| CAS1      | AFT    | 44.206   | 10.446    | 1.300                 | 1.061               | 25.0                       | 33.2                         | 0.466                | 4.2                | 113.9                    | 31.7                                         | 40.0                         | 0.380                | 3.4                | 115.0                    | della Vedova et al. (2001)   |
| CAS2      | AFT    | 44.174   | 10.424    | 0.965                 | 0.980               | 25.1                       | 32.4                         | 0.424                | 4.1                | 112.6                    | 32.7                                         | 40.0                         | 0.331                | 3.2                | 113.7                    | della Vedova et al. (2001)   |
| CAST2     | AFT    | 44.105   | 10.415    | 0.270                 | 0.811               | 25.0                       | 31.4                         | 0.372                | 4.1                | 112.2                    | 34.0                                         | 40.0                         | 0.264                | 3.0                | 113.0                    | della Vedova et al. (2001)   |
| CAST3     | AFT    | 44.105   | 10.415    | 0.240                 | 0.811               | 25.1                       | 31.9                         | 0.395                | 4.1                | 113.9                    | 33.5                                         | 40.0                         | 0.285                | 3.1                | 114.0                    | della Vedova et al. (2001)   |
| CB3       | AFT    | 44.051   | 9.830     | 0.000                 | 0.079               | 25.0                       | 32.8                         | 0.443                | 4.0                | 115.1                    | 32.3                                         | 40.0                         | 0.350                | 3.2                | 115.7                    | della Vedova et al. (2001)   |
| CB4       | AFT    | 44.051   | 9.830     | 0.000                 | 0.079               | 25.1                       | 32.5                         | 0.428                | 4.0                | 114.5                    | 32.6                                         | 40.0                         | 0.334                | 3.1                | 115.0                    | della Vedova et al. (2001)   |
| CB5       | AFT    | 44.051   | 9.830     | 0.000                 | 0.079               | 24.9                       | 33.7                         | 0.493                | 4.1                | 116.7                    | 31.3                                         | 40.0                         | 0.402                | 3.3                | 117.3                    | della Vedova et al. (2001)   |
| CH1       | AFT    | 43.601   | 11.411    | 0.303                 | 0.337               | 25.0                       | 36.1                         | 0.611                | 4.3                | 119.7                    | 23.9                                         | 35.0                         | 0.634                | 4.5                | 119.8                    | Pauselli et al. (2019)       |
| CH2       | AFT    | 43.541   | 11.430    | 0.504                 | 0.379               | 25.0                       | 35.8                         | 0.596                | 4.3                | 119.2                    | 29.1                                         | 40.0                         | 0.526                | 3.7                | 119.7                    | Pauselli et al. (2019)       |
| CH3       | AFT    | 43.565   | 11.382    | 0.722                 | 0.373               | 25.0                       | 35.3                         | 0.571                | 4.2                | 118.2                    | 28.1                                         | 38.5                         | 0.521                | 3.8                | 118.7                    | Pauselli et al. (2019)       |
| CH4       | AFT    | 43.562   | 11.380    | 0.857                 | 0.376               | 25.1                       | 35.1                         | 0.556                | 4.2                | 117.7                    | 28.4                                         | 38.5                         | 0.506                | 3.7                | 118.3                    | Pauselli et al. (2019)       |
| CIM1      | AFT    | 44.194   | 10.699    | 2.165                 | 1.121               | 25.0                       | 36.7                         | 0.637                | 4.4                | 118.9                    | 32.5                                         | 45.0                         | 0.533                | 3.4                | 119.8                    | della Vedova et al. (2001)   |
| CIM2      | AFT    | 44.194   | 10.704    | 2.045                 | 1.116               | 25.0                       | 36                           | 0.603                | 4.4                | 118.0                    | 33.4                                         | 45.0                         | 0.494                | 3.3                | 119.3                    | della Vedova et al. (2001)   |
| CIM3      | AFT    | 44.196   | 10.692    | 1.950                 | 1.124               | 25.0                       | 36.2                         | 0.616                | 4.4                | 118.                     |                                              |                              |                      |                    |                          |                              |

|         |     |        |        |       |       |      |      |       |     |       |      |      |       |     |       |                            |
|---------|-----|--------|--------|-------|-------|------|------|-------|-----|-------|------|------|-------|-----|-------|----------------------------|
| PR 11   | AFT | 44.463 | 9.930  | 0.880 | 0.808 | 25.0 | 32.9 | 0.452 | 4.2 | 114.4 | 32.0 | 40.0 | 0.361 | 3.3 | 115.1 | della Vedova et al. (2001) |
| PR 12   | AFT | 44.353 | 9.776  | 0.668 | 0.700 | 25.0 | 32.6 | 0.438 | 4.1 | 114.0 | 32.4 | 40.0 | 0.344 | 3.2 | 115.0 | della Vedova et al. (2001) |
| PR 15   | AFT | 44.472 | 9.966  | 1.085 | 0.837 | 25.1 | 34.8 | 0.543 | 4.3 | 117.7 | 30.1 | 40.0 | 0.466 | 3.6 | 118.0 | della Vedova et al. (2001) |
| PR 17   | AFT | 44.379 | 10.196 | 0.860 | 1.001 | 25.0 | 39.6 | 0.770 | 4.5 | 122.9 | 32.8 | 47.5 | 0.617 | 3.5 | 123.1 | della Vedova et al. (2001) |
| PR 18   | AFT | 44.380 | 10.194 | 0.780 | 1.001 | 25.0 | 37.9 | 0.693 | 4.5 | 121.5 | 34.6 | 47.5 | 0.522 | 3.3 | 121.5 | della Vedova et al. (2001) |
| PR 20   | AFT | 44.338 | 10.528 | 0.500 | 0.881 | 25.0 | 46.6 | 1.068 | 4.7 | 127.6 | 16.4 | 37.5 | 1.451 | 7.2 | 127.5 | della Vedova et al. (2001) |
| PR 22   | AFT | 44.331 | 10.564 | 1.082 | 0.851 | 25.0 | 49.7 | 1.186 | 4.8 | 129.0 | 14.9 | 37.5 | 1.634 | 7.9 | 127.9 | della Vedova et al. (2001) |
| PR 23.1 | AFT | 44.329 | 10.562 | 1.111 | 0.861 | 25.0 | 39.5 | 0.762 | 4.5 | 122.3 | 23.2 | 37.5 | 0.807 | 4.8 | 122.2 | della Vedova et al. (2001) |
| PR 25.1 | AFT | 44.320 | 9.995  | 0.248 | 0.639 | 25.0 | 33.3 | 0.471 | 4.2 | 116.5 | 34.5 | 42.5 | 0.339 | 3.1 | 116.7 | della Vedova et al. (2001) |
| PR 26   | AFT | 44.463 | 9.602  | 1.135 | 0.883 | 25.0 | 37.8 | 0.688 | 4.4 | 120.9 | 27.1 | 40.0 | 0.647 | 4.1 | 121.3 | della Vedova et al. (2001) |
| PR 27   | AFT | 44.525 | 9.824  | 0.618 | 0.726 | 25.0 | 37.9 | 0.696 | 4.4 | 121.6 | 24.6 | 37.5 | 0.705 | 4.5 | 121.3 | della Vedova et al. (2001) |
| PR 28.1 | AFT | 44.522 | 9.931  | 0.710 | 0.776 | 25.0 | 43.2 | 0.930 | 4.6 | 125.4 | 17.4 | 35.0 | 1.208 | 6.6 | 125.1 | della Vedova et al. (2001) |
| PR 28.2 | AFT | 44.522 | 9.931  | 0.702 | 0.776 | 25.0 | 39.8 | 0.776 | 4.5 | 122.7 | 20.5 | 35.0 | 0.908 | 5.5 | 122.8 | della Vedova et al. (2001) |
| PR 3    | AFT | 44.446 | 9.943  | 0.600 | 0.817 | 25.0 | 34.9 | 0.548 | 4.3 | 118.1 | 30.2 | 40.0 | 0.461 | 3.6 | 118.6 | della Vedova et al. (2001) |
| PR 5    | AFT | 44.456 | 9.804  | 0.718 | 0.777 | 25.0 | 33.4 | 0.476 | 4.2 | 115.9 | 29.2 | 37.5 | 0.414 | 3.6 | 116.5 | della Vedova et al. (2001) |
| PR 6.1  | AFT | 44.456 | 9.783  | 0.600 | 0.789 | 25.1 | 38.7 | 0.728 | 4.5 | 122.2 | 23.8 | 37.5 | 0.757 | 4.7 | 121.9 | della Vedova et al. (2001) |
| PR 7    | AFT | 44.550 | 9.940  | 0.301 | 0.748 | 25.0 | 36.2 | 0.615 | 4.4 | 120.2 | 23.7 | 35.0 | 0.645 | 4.6 | 120.0 | della Vedova et al. (2001) |
| RAM1    | AFT | 44.434 | 9.311  | 1.318 | 0.632 | 25.0 | 34.3 | 0.524 | 4.2 | 115.7 | 30.4 | 40.0 | 0.451 | 3.5 | 116.8 | della Vedova et al. (2001) |
| RAM3    | AFT | 44.427 | 9.312  | 1.075 | 0.606 | 25.1 | 36.4 | 0.620 | 4.3 | 119.4 | 28.5 | 40.0 | 0.563 | 3.8 | 119.8 | della Vedova et al. (2001) |
| RAM4    | AFT | 44.427 | 9.312  | 1.075 | 0.606 | 25.0 | 35   | 0.555 | 4.3 | 117.6 | 29.9 | 40.0 | 0.484 | 3.6 | 118.4 | della Vedova et al. (2001) |
| RAM5    | AFT | 44.422 | 9.311  | 0.950 | 0.587 | 25.0 | 34.9 | 0.554 | 4.3 | 117.8 | 29.9 | 40.0 | 0.480 | 3.6 | 118.4 | della Vedova et al. (2001) |
| RAM6    | AFT | 44.422 | 9.311  | 0.948 | 0.587 | 25.0 | 36   | 0.606 | 4.3 | 119.2 | 28.9 | 40.0 | 0.542 | 3.8 | 119.7 | della Vedova et al. (2001) |
| ROM1    | AFT | 44.002 | 11.472 | 0.890 | 0.562 | 25.0 | 37.7 | 0.682 | 4.4 | 120.9 | 16.8 | 29.0 | 0.918 | 6.4 | 119.7 | Pauselli et al. (2019)     |
| ROM2    | AFT | 44.001 | 11.472 | 0.760 | 0.560 | 25.0 | 38.3 | 0.712 | 4.4 | 121.7 | 16.2 | 29.0 | 0.986 | 6.7 | 120.4 | Pauselli et al. (2019)     |
| ROM3    | AFT | 44.000 | 11.475 | 0.675 | 0.560 | 25.0 | 41.1 | 0.839 | 4.5 | 123.8 | 13.8 | 29.0 | 1.280 | 8.0 | 122.5 | Pauselli et al. (2019)     |
| ROM4    | AFT | 43.998 | 11.477 | 0.575 | 0.563 | 25.0 | 40.3 | 0.802 | 4.5 | 123.3 | 14.4 | 29.0 | 1.208 | 7.7 | 122.4 | Pauselli et al. (2019)     |
| ROM5    | AFT | 43.994 | 11.477 | 0.480 | 0.562 | 25.0 | 34.6 | 0.535 | 4.3 | 117.8 | 19.4 | 29.0 | 0.667 | 5.5 | 117.4 | Pauselli et al. (2019)     |
| S 1     | AFT | 44.178 | 10.160 | 0.546 | 0.662 | 25.1 | 34.7 | 0.539 | 4.3 | 118.0 | 32.9 | 42.5 | 0.421 | 3.3 | 118.5 | della Vedova et al. (2001) |
| S 3     | AFT | 44.139 | 10.073 | 0.494 | 0.374 | 25.1 | 35.1 | 0.559 | 4.2 | 118.4 | 32.3 | 42.5 | 0.451 | 3.3 | 118.9 | della Vedova et al. (2001) |
| S 4     | AFT | 44.128 | 10.059 | 0.636 | 0.330 | 25.0 | 38.3 | 0.714 | 4.4 | 121.6 | 28.9 | 42.5 | 0.640 | 3.8 | 121.8 | della Vedova et al. (2001) |
| SC 2    | AFT | 44.081 | 10.083 | 0.204 | 0.342 | 25.1 | 34.6 | 0.534 | 4.2 | 118.1 | 30.5 | 40.0 | 0.448 | 3.5 | 118.4 | della Vedova et al. (2001) |
| SILL1   | AFT | 44.368 | 10.064 | 1.861 | 0.860 | 25.0 | 35   | 0.560 | 4.3 | 116.2 | 33.9 | 44.5 | 0.453 | 3.2 | 118.0 | della Vedova et al. (2001) |
| SILL10  | AFT | 44.334 | 10.050 | 0.730 | 0.754 | 25.1 | 34.3 | 0.516 | 4.3 | 117.1 | 35.3 | 44.5 | 0.381 | 3.0 | 118.0 | della Vedova et al. (2001) |
| SILL2   | AFT | 44.361 | 10.074 | 1.790 | 0.863 | 25.1 | 34   | 0.503 | 4.1 | 111.6 | 35.4 | 45.0 | 0.394 | 3.0 | 114.4 | della Vedova et al. (2001) |
| SILL3   | AFT | 44.357 | 10.073 | 1.600 | 0.853 | 25.0 | 37.1 | 0.659 | 4.4 | 120.0 | 32.3 | 45.0 | 0.551 | 3.4 | 121.0 | della Vedova et al. (2001) |
| SILL4   | AFT | 44.455 | 10.076 | 1.530 | 0.951 | 25.0 | 38.1 | 0.704 | 4.5 | 121.2 | 26.8 | 40.0 | 0.671 | 4.2 | 121.4 | della Vedova et al. (2001) |
| SILL5   | AFT | 44.354 | 10.071 | 1.420 | 0.843 | 25.0 | 36.3 | 0.620 | 4.4 | 119.2 | 33.2 | 45.0 | 0.503 | 3.3 | 120.2 | della Vedova et al. (2001) |
| SILL6   | AFT | 44.353 | 10.057 | 1.260 | 0.815 | 25.0 | 35.9 | 0.602 | 4.4 | 118.9 | 33.1 | 44.5 | 0.484 | 3.3 | 119.5 | della Vedova et al. (2001) |
| SILL7   | AFT | 44.338 | 10.058 | 1.130 | 0.781 | 25.0 | 36.7 | 0.639 | 4.4 | 120.0 | 32.4 | 44.5 | 0.524 | 3.4 | 120.4 | della Vedova et al. (2001) |
| SILL9   | AFT | 44.334 | 10.050 | 0.780 | 0.755 | 25.0 | 37.1 | 0.658 | 4.4 | 120.5 | 32.2 | 44.5 | 0.534 | 3.4 | 121.0 | della Vedova et al. (2001) |
| SM 3    | AFT | 44.164 | 10.129 | 0.250 | 0.558 | 25.0 | 31.9 | 0.398 | 4.1 | 113.1 | 35.9 | 42.5 | 0.274 | 2.9 | 114.0 | della Vedova et al. (2001) |
| SU 1    | AFT | 44.170 | 10.188 | 0.773 | 0.724 | 25.0 | 35.1 | 0.566 | 4.3 | 118.6 | 32.3 | 42.5 | 0.454 | 3.4 | 119.1 | della Vedova et al. (2001) |
| TCGA    | AFT | 43.993 | 11.476 | 0.360 | 0.560 | 25.0 | 36.8 | 0.643 | 4.4 | 120.6 | 17.2 | 29.0 | 0.877 | 6.3 | 119.7 | Pauselli et al. (2019)     |
| VALD1   | AFT | 43.594 | 11.603 | 0.497 | 0.484 | 25.0 | 37.6 | 0.681 | 4.4 | 121.3 | 16.7 | 29.0 | 0.937 | 6.5 | 120.1 | Pauselli et al. (2019)     |
| VALD10  | AFT | 43.653 | 11.640 | 1.400 | 0.836 | 25.0 | 35.6 | 0.582 | 4.3 | 118.1 | 18.3 | 28.5 | 0.740 | 5.8 | 116.9 | Pauselli et al. (2019)     |
| VALD11  | AFT | 43.663 | 11.641 | 1.450 | 0.644 | 25.0 | 38.1 | 0.701 | 4.4 | 120.8 | 15.9 | 28.0 | 0.962 | 6.8 | 119.3 | Pauselli et al. (2019)     |
| VALD12  | AFT | 43.696 | 11.673 | 0.960 | 0.717 | 25.0 | 35.6 | 0.582 | 4.3 | 118.5 | 17.7 | 28.0 | 0.769 | 6.1 | 117.5 | Pauselli et al. (2019)     |
| VALD2   | AFT | 43.612 | 11.645 | 0.500 | 0.550 | 25.0 | 33.8 | 0.495 | 4.2 | 116.6 | 21.2 | 30.0 | 0.573 | 4.9 | 116.1 | Pauselli et al. (2019)     |
| VALD3   | AFT | 43.614 | 11.656 | 0.580 | 0.559 | 25.0 | 34.7 | 0.541 | 4.3 | 117.8 | 20.4 | 30.0 | 0.646 | 5.2 | 117.5 | Pauselli et al. (2019)     |
| VALD4   | AFT | 43.620 | 11.648 | 0.740 | 0.567 | 25.0 | 37.4 | 0.673 | 4.4 | 120.9 | 17.4 | 29.5 | 0.888 | 6.2 | 119.9 | Pauselli et al. (2019)     |
| VALD5   | AFT | 43.621 | 11.656 | 0.850 | 0.572 | 25.0 | 40.1 | 0.796 | 4.5 | 123.1 | 15.7 | 30.0 | 1.109 | 7.0 | 121.8 | Pauselli et al. (2019)     |
| VALD6   | AFT | 43.620 | 11.659 | 0.880 | 0.571 | 25.0 | 35.4 | 0.575 | 4.3 | 118.3 | 19.8 | 30.0 | 0.692 | 5.4 | 117.6 | Pauselli et al. (2019)     |
| VALD7   | AFT | 43.604 | 11.651 | 1.100 | 0.536 | 25.0 | 36   | 0.606 | 4.3 | 119.0 | 20.2 | 31.0 | 0.709 | 5.3 | 118.0 | Pauselli et al. (2019)     |
| VALD8   | AFT | 43.626 | 11.684 | 1.200 | 0.585 | 25.0 | 33.9 | 0.503 | 4.2 | 115.2 | 21.7 | 30.5 | 0.562 | 4.7 | 114.2 | Pauselli et al. (2019)     |
| VALD9   | AFT | 43.646 | 11.652 | 1.200 | 0.619 | 25.0 | 34.1 | 0.512 | 4.2 | 115.7 | 20.1 | 29.0 | 0.608 | 5.1 | 114.4 | Pauselli et al. (2019)     |
| ZAT2    | AFT | 44.391 | 9.442  | 1.349 | 0.637 | 25.0 | 33.5 | 0.483 | 4.0 | 112.2 | 31.2 | 40.0 | 0.408 | 3.3 | 113.7 | della Vedova et al. (2001) |

Kinetic Parameters for FT apatite (from Ketcham et al., 1999)

$E_a = 147 \text{ kJ mol}^{-1}$  (activation energy)

$\Omega = 2.05 \times 10^6$  (measured directly from annealing experiments)

$t_{c,10} = 116^\circ\text{C}$  (effective closure temperature for  $10 \text{ Myr}^{-1}$  cooling rates)



**Supplementary Table 7 Erosion rates and parameters for AFT detrital samples.**

|          |              |          |           |                       | Imposed $G_0 = 25$ ( $^{\circ}\text{C}/\text{km}$ ) |                                  |              |               |                        | $G_t$ calculated from heat flow measurements |                                  |              |               |                        | Heat Flow Measurement Source |
|----------|--------------|----------|-----------|-----------------------|-----------------------------------------------------|----------------------------------|--------------|---------------|------------------------|----------------------------------------------|----------------------------------|--------------|---------------|------------------------|------------------------------|
| ID       | Method       | Latitude | Longitude | Sample Elevation (km) | Geothermal Gradient                                 | Geothermal Gradient              | Erosion Rate | Closure Depth | Closure Temperature    | Initial Geothermal Gradient                  | Final Geothermal Gradient        | Erosion Rate | Closure Depth | Closure Temperature    |                              |
|          |              |          |           |                       | ( $^{\circ}\text{C}/\text{km}$ )                    | ( $^{\circ}\text{C}/\text{km}$ ) | (km/My)      | (km)          | ( $^{\circ}\text{C}$ ) | ( $^{\circ}\text{C}/\text{km}$ )             | ( $^{\circ}\text{C}/\text{km}$ ) | (km/My)      | (km)          | ( $^{\circ}\text{C}$ ) |                              |
| Enza     | AFT Detrital | 44.620   | 10.413    | 0.163                 | 25.0                                                | 38.0                             | 0.699        | 4.3           | 121.5                  | 12.5                                         | 25.0                             | 1.189        | 8.5           | 120.1                  | della Vedova et al. (2001)   |
| Nure     | AFT Detrital | 44.872   | 9.647     | 0.208                 | 25.0                                                | 39.7                             | 0.775        | 4.4           | 123.0                  | 12.1                                         | 26.0                             | 1.327        | 8.9           | 121.2                  | della Vedova et al. (2001)   |
| Panaro   | AFT Detrital | 44.477   | 11.027    | 0.099                 | 25.0                                                | 34.2                             | 0.517        | 4.2           | 117.3                  | 13.3                                         | 22.5                             | 0.882        | 7.6           | 115.2                  | della Vedova et al. (2001)   |
| Secchia  | AFT Detrital | 44.532   | 10.758    | 0.119                 | 25.0                                                | 34.7                             | 0.543        | 4.2           | 118.1                  | 9.9                                          | 19.5                             | 1.173        | 10.3          | 114.9                  | della Vedova et al. (2001)   |
| Taro     | AFT Detrital | 44.713   | 10.120    | 0.117                 | 25.0                                                | 38.2                             | 0.710        | 4.3           | 121.7                  | 14.7                                         | 27.5                             | 1.067        | 7.3           | 120.7                  | della Vedova et al. (2001)   |
| Trebbia  | AFT Detrital | 44.901   | 9.584     | 0.140                 | 25.0                                                | 39.9                             | 0.789        | 4.4           | 123.2                  | 11.0                                         | 25.0                             | 1.439        | 9.8           | 121.3                  | della Vedova et al. (2001)   |
| Bisenzio | AFT Detrital | 43.928   | 11.126    | 0.102                 | 25.0                                                | 36.6                             | 0.637        | 4.3           | 120.4                  | 19.5                                         | 31.0                             | 0.779        | 5.5           | 119.8                  | Pauselli et al. (2019)       |
| Lima1    | AFT Detrital | 44.000   | 10.560    | 0.097                 | 25.0                                                | 36.4                             | 0.628        | 4.3           | 120.2                  | 28.4                                         | 40.0                             | 0.563        | 3.7           | 120.2                  | della Vedova et al. (2001)   |
| Lima2    | AFT Detrital | 44.091   | 10.760    | 0.544                 | 25.0                                                | 35.5                             | 0.582        | 4.3           | 118.8                  | 34.4                                         | 45.0                             | 0.442        | 3.1           | 119.6                  | della Vedova et al. (2001)   |
| Magra1   | AFT Detrital | 44.188   | 9.925     | 0.036                 | 25.0                                                | 37.0                             | 0.654        | 4.3           | 120.6                  | 27.9                                         | 40.0                             | 0.597        | 3.8           | 120.6                  | della Vedova et al. (2001)   |
| Magra2   | AFT Detrital | 44.387   | 9.887     | 0.251                 | 25.0                                                | 36.9                             | 0.651        | 4.3           | 120.5                  | 27.9                                         | 40.0                             | 0.592        | 3.9           | 120.6                  | della Vedova et al. (2001)   |
| Pescia   | AFT Detrital | 43.929   | 10.693    | 0.105                 | 25.1                                                | 33.1                             | 0.459        | 4.1           | 115.6                  | 34.4                                         | 42.5                             | 0.343        | 3.0           | 116.2                  | della Vedova et al. (2001)   |
| Serchio  | AFT Detrital | 44.192   | 10.306    | 0.525                 | 25.0                                                | 33.7                             | 0.494        | 4.2           | 116.6                  | 33.8                                         | 42.5                             | 0.377        | 3.1           | 117.2                  | della Vedova et al. (2001)   |
| Vara     | AFT Detrital | 44.198   | 9.851     | 0.032                 | 25.0                                                | 35.5                             | 0.585        | 4.2           | 119.3                  | 29.4                                         | 40.0                             | 0.509        | 3.6           | 119.5                  | della Vedova et al. (2001)   |

Kinetic Parameters for FT apatite (from Ketchum et al., 1999)

$E_a = 147 \text{ kJ mol}^{-1}$  (activation energy)

$\Omega = 2.05 \times 10^6$  (measured directly from annealing experiments)

$t_{c,10} = 116^{\circ}\text{C}$  (effective closure temperature for  $10 \text{ Myr}^{-1}$  cooling rates)

**Supplementary Table 8 Erosion rates and parameters for ZHe samples.**

|              |        |          |           |                       |                     | Imposed $G_0 = 25$ ( $^{\circ}\text{C}/\text{km}$ ) |                                  |              |               |                        | $G_t$ calculated from heat flow measurements |                                  |              |               |                        | Heat Flow Measurement Source |
|--------------|--------|----------|-----------|-----------------------|---------------------|-----------------------------------------------------|----------------------------------|--------------|---------------|------------------------|----------------------------------------------|----------------------------------|--------------|---------------|------------------------|------------------------------|
| ID           | Method | Latitude | Longitude | Sample Elevation (km) | Mean Elevation (km) | Initial Geothermal Gradient                         | Final Geothermal Gradient        | Erosion Rate | Closure Depth | Closure Temperature    | Initial Geothermal Gradient                  | Final Geothermal Gradient        | Erosion Rate | Closure Depth | Closure Temperature    |                              |
|              |        |          |           |                       |                     | ( $^{\circ}\text{C}/\text{km}$ )                    | ( $^{\circ}\text{C}/\text{km}$ ) | (km/My)      | (km)          | ( $^{\circ}\text{C}$ ) | ( $^{\circ}\text{C}/\text{km}$ )             | ( $^{\circ}\text{C}/\text{km}$ ) | (km/My)      | (km)          | ( $^{\circ}\text{C}$ ) |                              |
| 020620-3     | ZHe    | 44.122   | 10.068    | 0.756                 | 0.395               | 25                                                  | 38.2                             | 0.71         | 6.6           | 178.1                  | 27                                           | 40                               | 0.667        | 6.23          | 179.4                  | della Vedova et al. (2001)   |
| 020620-3 rep | ZHe    | 44.122   | 10.068    | 0.756                 | 0.395               | 25                                                  | 38.3                             | 0.71         | 6.7           | 179.0                  | 27                                           | 40                               | 0.675        | 6.29          | 180.1                  | della Vedova et al. (2001)   |

Kinetic Parameters for (U-Th)/He zircon (from Reiners et al., 2004)

$E_a = 169 \text{ kJ mol}^{-1}$  (activation energy)

$a_s = 60 \text{ }\mu\text{m}$  (effective spherical radius for the diffusion domain)

$\Omega = 7.03 \times 10^5$  (frequency factor calculated as  $55D_0\text{a}^{-3}$ )

$t_{c,10} = 183^{\circ}\text{C}$  (effective closure temperature for  $10 \text{ Myr}^{-1}$  cooling rates and specified  $a_s$  value)
